# Supplementary material
Source: PubMed Central journal article supplement (PMC2848909)
Supplement: NIHMS181219-supplement-Supp1.pdf [file NIHMS181219-supplement-Supp1.pdf]

## Supplemental Material

|                                                                                                                                                                                                                                                                                                          |              |
|----------------------------------------------------------------------------------------------------------------------------------------------------------------------------------------------------------------------------------------------------------------------------------------------------------|--------------|
| <b>Supplemental Materials and Methods</b>                                                                                                                                                                                                                                                                | <b>2-12</b>  |
| <b>Legends to Online Figures I and II</b>                                                                                                                                                                                                                                                                | <b>13-14</b> |
| <b>Online Figures</b>                                                                                                                                                                                                                                                                                    |              |
| Online Figure I                                                                                                                                                                                                                                                                                          | <b>15</b>    |
| Online Figure II                                                                                                                                                                                                                                                                                         | <b>16</b>    |
| <b>Online Tables</b>                                                                                                                                                                                                                                                                                     |              |
| Online Table I - <i>Glucose Concentration</i>                                                                                                                                                                                                                                                            | <b>17</b>    |
| Online Table II - <i>Weight of mice</i>                                                                                                                                                                                                                                                                  | <b>18</b>    |
| Online Table III - <i>Cholesterol Concentration</i>                                                                                                                                                                                                                                                      | <b>19</b>    |
| Online Table IV - <i>Differentially Expressed Genes in Diabetic ApoE null Relative to Non-Diabetic ApoE null mice</i>                                                                                                                                                                                    | <b>20-22</b> |
| Online Table V - <i>Differentially Expressed Genes in Diabetic ApoE null/RAGE null Relative to Diabetic ApoE null mice</i>                                                                                                                                                                               | <b>23-30</b> |
| Online Table VI - <i>Statistically Significant KEGG Pathways Associated with Differentially-Expressed Genes for Diabetic ApoE null Relative to Non-Diabetic ApoE null mice</i>                                                                                                                           | <b>31</b>    |
| Online Table VII - <i>Statistically Significant KEGG Pathways Associated with Differentially Expressed Genes for Diabetic ApoE null/RAGE null Relative to Diabetic ApoE null mice</i>                                                                                                                    | <b>32</b>    |
| Online Table VIII - <i>Fold Changes of Differentially Expressed Tgf-<math>\beta</math> Pathway Genes in Diabetic ApoE null Relative to Non-Diabetic ApoE null mice</i>                                                                                                                                   | <b>33</b>    |
| Online Table IX - <i>Fold Changes of Differentially Expressed Tgf-<math>\beta</math> Pathway Genes in Diabetic ApoE null/RAGE null Relative to Diabetic ApoE null mice</i>                                                                                                                               | <b>34</b>    |
| Online Table X - <i>Perturbation Factors of Differentially Expressed Tgf-<math>\beta</math> Pathway Genes in Diabetic ApoE null Relative to Non-Diabetic ApoE null mice</i>                                                                                                                              | <b>35</b>    |
| Online Table XI - <i>Perturbation Factors of Differentially Expressed Tgf-<math>\beta</math> Pathway Genes in Diabetic ApoE null/RAGE null Relative to Diabetic ApoE null mice</i>                                                                                                                       | <b>36</b>    |
| Online Table XII - <i>Numbers of Differentially Expressed Genes with Unique Entrez Gene Symbols for Diabetic ApoE null mice vs. Non-Diabetic ApoE null mice and for Diabetic ApoE null /RAGE null vs. Diabetic ApoE null mice, and their Directional and Boolean Subsets</i>                             | <b>37-38</b> |
| Online Table XIII - <i>Differentially Expressed Genes with Unique Entrez Gene Symbols for Diabetic ApoE null mice vs. Non-Diabetic ApoE null mice and for Diabetic ApoE null / RAGE null vs. Diabetic ApoE null mice, and their Boolean Subsets</i>                                                      | <b>39-44</b> |
| Online Table XIV - <i>Differentially Expressed Genes with Unique Entrez Gene Symbols for Diabetic ApoE null mice vs. Non-Diabetic ApoE null mice and for Diabetic ApoE null / RAGE null vs. Diabetic ApoE null mice both with Positive log<sub>2</sub> Fold Change and their Boolean Subsets</i>         | <b>45-46</b> |
| Online Table XV - <i>Differentially Expressed Genes with Unique Entrez Gene Symbols for Diabetic ApoE null mice vs. Non-Diabetic ApoE null mice and for Diabetic ApoE null / RAGE null vs. Diabetic ApoE null mice both with Negative log<sub>2</sub> Fold Change and their Boolean Subsets</i>          | <b>47-52</b> |
| Online Table XVI - <i>Differentially Expressed Genes with Unique Entrez Gene Symbols for Diabetic ApoE null mice vs. Non-Diabetic ApoE null mice with Positive log Fold Change, and for Diabetic ApoE null/RAGE null vs. Diabetic ApoE null with Negative log Fold Change and their Boolean Subsets</i>  | <b>53-58</b> |
| Online Table XVII - <i>Differentially Expressed Genes with Unique Entrez Gene Symbols for Diabetic ApoE null vs. Non-Diabetic ApoE null mice with Negative log Fold Change, and for Diabetic ApoE null/RAGE null vs. Diabetic ApoE null mice with Positive log Fold Change and their Boolean Subsets</i> | <b>59-60</b> |

## Supplemental Materials and Methods

### Animal Studies

All procedures were performed and approved by the Institutional Animal Care and Use Committee at Columbia University. Genomic DNA was isolated from tail biopsies, and PCR analysis was used to identify the deficiency of both genes *ApoE* and *RAGE*. At age 6 weeks, certain mice were rendered diabetic by administration of 5 daily intraperitoneal injections of streptozotocin, 65 mg/kg in citrate buffer (0.05 mol/L; pH 4.5) (Sigma Aldrich). Control mice were treated with citrate buffer alone. Serum glucose was measured from tail vein blood using a glucometer; serum glucose on at least two separate occasions of >250 mg/dl was considered diabetic state. Beginning at age 9 or 14 weeks, certain diabetic and nondiabetic mice were euthanized. Serum glucose was measured again before euthanasia to ensure that mice remained diabetic and the mice were weighed.

Four mice in each of the four categories were sampled at age 9 weeks for glucose, body weight, serum cholesterol, and RNA experiments, with the exception that 3 non-diabetic ApoE null / RAGE null mice were sampled. Western blotting was performed on all 4 mice in each group. An additional set of 4 mice per group was prepared for ROCK1 activation experiments. Ten mice each in the ApoE null and ApoE /RAGE null categories were initially made diabetic for experiments at 14 weeks, but, of these, only 8 ApoE null mice, and only 7 ApoE /RAGE null mice, remained diabetic at 14 weeks and were the subjects of glucose, weight, cholesterol, and atherosclerotic lesion experiments. Total aortic segments from root to bifurcation were snap-frozen for further analysis. Aortic roots were embedded into OCT (Tissue-Tek) and further sectioned for histological and immunohistochemical analysis. To determine the cellular constituents of the lesions, 10 µm thick sections at the aortic sinus were cut and immunostaining

was performed with a mouse monoclonal antibody raised to smooth muscle-actin (SMA, Dako Cytomation) (Glostrup, Denmark), mouse monoclonal antibody raised to CD68 for detection of macrophages (Dako Cytomation), and a mouse monoclonal antibody to detect total T cells (BD Pharmingen). To detect collagen, Picrosirius Red staining with polarized microscopy was performed as described in Ref. 3 in the text. Immunostaining was performed using a two-step procedure (primary antibody followed by MOM fluorescein kit) (Vector Laboratories) (Burlingame CA). The % cellular component was determined by dividing the total % of cells/total lesion area using a Zeiss microscope and attached image analysis program. The image analysis program was set to determine the % area occupied by each of the cell types or collagen and in each case divided by the total lesion area (latter determined by Oil Red O on immediately adjacent section). In each case, staining with nonimmune control IgG was first performed to set background followed by analysis of sections stained with primary antigen-specific antibodies.

Assessment of statistical significance of changes in serum glucose levels between different genotype and disease states was determined using the 2 sample t-test. The statistical significance of the glucose concentration being above the diabetic threshold of 250 mg/ml, for nominally diabetic mice, and below the threshold for nominally non-diabetic mice, was determined using the 1 sample t-test. 95% confidence limits of the weight were calculated using the 1 sample t-test. All t-tests were performed in R (1).

### **Biochemical analyses**

Levels of total cholesterol were determined in plasma of mice fasted for at least 8 hrs prior to euthanasia using chromogenic assays (Thermo Electron Corporation). The statistical significance

of changes in cholesterol between different genotype and disease at 9 and 14 weeks was determined using the 2 sample t-test.

### **RNA Isolation and GeneChip Analysis.**

All arrays in this study were normalized together using Robust Multiarray Average (RMA) (2). Log fold changes between conditions and the statistical significance of these fold changes were determined using contrasts in Linear Models for MicroArrays (LIMMA) (3). Both RMA and LIMMA are implemented in Bioconductor (4) which runs under R (2). The data have been deposited in the gene expression omnibus GEO (5), series accession number GSE15729 . Accession numbers (GeneIds) and gene symbols in NCBI Entrez Gene Database (where official symbols differ from that used in this paper, we give the official symbols first): Acta2/SMA(11475), Ager/RAGE (11596), ApoE(11816), Ltbp1(268977), PECAM1/CD31(18613), Ppp2r1b/PP2A(73699), Tgfbr1(21812), Tgfbr2(21813), RhoA (1848), Tgfb2/Tgf-b2 (21808), Thbs1(21825), Rock1(19877), and Smurf2(66313). Probesets were taken to be statistically significantly differentially expressed for a contrast between 2 conditions if their Bayesian log odds parameter,  $B > 0$ . The Benjamini-Hochberg false discovery rate (P(BH)) (6) is also given for comparison for select genes.

### **Pathway Express Analysis**

The KEGG Pathways (7) associated with differential expression between conditions were identified with Pathway Express which identifies the pathways associated with differential expression in a way that takes pathway structure into account. Pathways with a gamma p-value calculated using the hypergeometric distribution and corrected for false discoveries of  $\leq 0.05$  are

taken to be statistically significantly associated with the differential expression of a given contrast.

Perturbation factors, as referred to in the manuscript text, are defined and discussed in detail by Draghici and colleagues (8) are effective  $\log_2$  fold changes which take into account both any actual change in the expression of the gene and the effect of those genes in the pathway upstream from it upon the pathway at the protein level.

The perturbation factor,  $PF(g)$ , of a gene product,  $g$ , in a pathway is defined by Draghici et al. (8) as follows:

$$PF(g) = \log_2 FC + \sum_{u \in US_g} \beta_{ug} \frac{PF(u)}{N_{ds}(u)}$$

Where  $\log_2 FC$  is the base 2 logarithm of the fold-change of the gene. The second term is a sum over all of the genes,  $u$ , whose products are upstream in the pathway from gene  $g$ .  $PF(u)$  is the perturbation factor of gene product  $u$ .  $\beta_{ug}$  is positive if gene product  $u$  is an activator in the pathway, and negative if it is an inhibitor.  $N_{ds}(u)$  is the number of gene products downstream from gene  $u$ . For a thorough discussion of the implications of this equation, see the original paper by Draghici et. al. (8).

### **Real-Time RT-PCR validation**

Data were analyzed by the  $2^{-\Delta\Delta CT}$  method. The statistical significance (p-values and 95% confidence limits) of these measurements were determined by the t-test as implemented in R (1).

The t-test was applied to the count and log-fold change data so that reported 95% confidence limits for antilogs of counts and fold changes may be slightly asymmetric.

### **Western blot analysis**

Total lysate from mouse aorta was immunoblotted and probed with Thbs1-specific antibody (Lifespan biosciences, catalog # LS-C33686), Tgf- $\beta$ 2-specific antibody (from Santa Cruz Biotechnology, catalog # sc-90) and ROCK1-specific antibody (Santa Cruz Biotechnology, catalog # sc-17794). HRP-conjugated donkey anti-rabbit IgG (Amersham Pharmacia Biotechnology, catalog # NA934) or HRP-conjugated sheep anti-mouse IgG (Amersham Pharmacia Biotechnology, catalog # NA931) was used to identify sites of binding of the primary antibody. After probing with the primary antibodies, membranes were stripped of bound immunoglobulins and reprobed with GAPDH (Abcam, catalog # ab8245). Blots were scanned with an AlfaImager TM 2200 scanner with AlfaEase (AlfaImager) FC 2200 software. Results are reported as a relative absorbance of test antigen to GAPDH.

### **Immunohistochemistry**

Acetone-fixed cryostat aortic sections were preincubated with CAS-BLOCK (Zymed; Invitrogen) for 30 minutes followed by avidin-biotin block for 15 minutes; sections were then subjected to incubation with primary rabbit polyclonal RAGE IgG, (8-9) and Thbs1, TGF- $\beta$ 2, and ROCK1 antibodies as described above, followed by donkey anti-rabbit IgG as described above. Subsequently, Alexa Fluor 555 conjugate (Invitrogen) was incubated for 30 minutes. After washing, rat monoclonal CD31/PECAM1 antibody (Abcam, Catalog #ab7388) or mouse monoclonal smooth muscle actin (DakoCytomatin, CodeM0851) antibody were incubated for 1 hour followed by anti-rabbit or anti-mouse IgG, described above for 30 minutes, and then incubated with Alexa Fluor 488 conjugate (Invitrogen) for 30 minutes. Rabbit IgG (Zymed;

Invitrogen) or omission of the primary antibody was used as a negative control. Slides were mounted with Vectorshield mounting media (Vector) and observed with an oil immersion objective using a Nikon E800 microscope. Images were collected using a Bio-Rad Radiance 2000 Confocal System and the Lasersharp 2000 software (Bio-Rad).

### **ROCK1 activity assays.**

Activation of ROCK1 was evaluated on lysates of aorta or primary murine aortic smooth muscle cells retrieved from wild-type or RAGE null mice. In the latter case, SMCs were stimulated with S100B (10  $\mu\text{g/ml}$  for the indicated times and subjected to ROCK1 activity assays (9-10). Aortas or SMCs were lysed using a Triton X-100 lysis buffer containing 50 mM Tris (pH 7.5), 10 mM  $\text{MgCl}_2$ , 0.5 M NaCl and 1% Triton X-100. The samples were incubated with Anti-ROCK1 antibody described above for 1hr further with Protein G coated agarose beads for overnight at 4°C, and the beads were washed three times with lysis buffer. The amount of ROCK1 associated with the beads was incubated with 50 $\mu\text{l}$  kinase buffer, 1  $\mu\text{l}$  10mM ATP (Cell Signalling) and 0.5  $\mu\text{g}$  phosphorylated myosin phosphatase-1 (MYPT1)/protein phosphatase-1 regulatory (inhibitor) subunit 12A (Ppp1r12a) substrate (Upstate Biotech) at 30°C for 30 min. Reaction was stopped by adding sample buffer, boiled for 5 min and the amount of phosphorylated MYPT1 was examined by immunoblotting using Thr850-phosphorylation specific antibody 36-003 (Upstate Biotechnology). After probing with the primary antibodies, membranes were stripped of bound immunoglobulins and reprobed with ROCK1 antibody as described above for normalization. Equal quantities of ROCK1 were treated with equal quantities of MYPT1/Ppp1r12a. Relative absorbances were measured as described above, and these were used to determine the relative

activation of ROCK1. Statistical analysis was performed by the t-test and the results anti-log-transformed as above.

**Smooth Muscle Cell Migration and Proliferation Assays.** Wild-type and RAGE null mice vascular smooth muscle cells were isolated and cultured from the aorta and employed through passage 5 to 7. Migration assays were performed using the QCM Colorimetric Cell Migration Assay (Chemicon). Cells ( $3 \times 10^5$ /well) were seeded into the upper chambers fitted with a lower 8  $\mu$ m porous polycarbonate membrane, and the insert was placed in the lower chamber of a 24-well dish containing Dulbeccos' modified Eagle medium and no stimulant, S100B (10  $\mu$ g/ml; generously provided by Dr. Guenter Fritz), Tgf- $\beta$ 2 (10 ng/ml; R&D Systems), or PDGF (10 ng/ml; R&D Systems) and incubated at 37°C for 5 hrs and relative migration was measured according to the manufacturer's instructions. In experiments using anti-Tgf- $\beta$ 2 IgG and nonimmune IgG (10  $\mu$ g/ml, both from Santa Cruz Biotechnology, Santa Cruz, CA), Y27632 (10  $\mu$ M, Sigma Aldrich) and fasudil hydrochloride (10  $\mu$ M, Tocris Bioscience, Ellisville MO) cells were preincubated with these agents or vehicle alone for 2 hrs in the case of antibodies and 30 mins in the case of Y27632 or fasudil at 37°C prior to the addition to the chemotaxis chambers. Proliferation of cultured SMCs was quantified by measurement of incorporation of tritiated thymidine. SMCs were seeded at a density of  $2 \times 10^4$  cells/wells in 24-well tissue culture-treated plates and incubated in serum-free DMEM for 16 hrs. Following a 2 hr preincubation with the indicated concentration of anti-Tgf- $\beta$ 2, nonimmune IgG, Y27632 or fasudil, cells were exposed to serum-free DMEM containing the indicated concentration of S100B or PDGF (10 ng/ml) along with  $^3$ H-thymidine (1  $\mu$ Ci/well). After the incubation period, cells were harvested 48 hrs later, and cellular proliferation was determined based on the incorporation of tritiated thymidine.



Cell counting was performed and confirmed that increased tritiated thymidine incorporation reflected an increase in cell number.

### **Inference of pathway model from gene expression data**

It is useful and instructive to infer a working model of the effect of changes of gene expression on the flow of biochemical information through signaling pathways of interest. Such a model is of course approximate and must be tested by experiment at the protein level, and, if necessary, subsequently modified in the light of experiment. However, such a model helps us to predict tentatively the biological signaling consequences of observed changes in expression, which can be used to formulate falsifiable hypotheses, which can be tested experimentally. The model in Figure 7 was formulated according to the following qualitative, common sense rules:

1. The amount of activated protein changes in 2 ways: Changes in total quantity of protein (arrows with circles on bottom in left hand column of Figure 7) and changes in the fraction of protein that is activated at constant protein concentration (arrows with diamonds on bottom in center column of Figure 7). The direction of these two component changes determines the direction of the change of amount of activated protein (arrows in right hand column).
2. Arrows pointing up indicate an increase. Arrows pointing down indicate a decrease. Horizontal arrows indicate no change.
3. The pathway model is inferred entirely on the basis of gene expression data and prior

knowledge of pathway interactions. PCR and Western validation results are not included because we do not have this information for all proteins in the pathway and we wish to keep our inference for all genes on an equal footing.

4. If information is lacking on the direction of a change in the total quantity of protein (left hand column of arrows with circles on bottom) and/or fraction of protein that is activated at constant protein concentration (center column of arrows) then it is assumed that there will be no change in these quantities (horizontal arrows).
5. The direction of change of the total amount of activated protein within a step is determined by the following rules:
  - A. If both of the arrows in the left hand and central columns point up (total amount of protein increases and fraction of protein which is activated at constant protein concentration increases) then the arrow in the right hand column points up (total amount of activated protein increases).
  - B. If both of the arrows in the left hand and central columns point down (total amount of protein decreases and fraction of protein which is activated at constant protein concentration decreases) then the arrow in the right hand column points down (total amount of activated protein decreases).
  - C. If both of the arrows in the left hand and central columns are horizontal (total amount of protein remains the same and fraction of protein which is activated at constant protein concentration remains the same) then the arrow in the right

hand column is horizontal (total amount of activated protein remains the same).

- D. If one of the arrows in the left hand or central columns points up and the other is horizontal (total amount of protein increases (remains the same) or fraction of protein which is activated at constant protein concentration increases (or remains the same) then the arrow in the right hand column points up (total amount of activated protein increases).
- E. If one of the arrows in the left hand or central columns points down and the other is horizontal (total amount of protein decreases (remains the same) or fraction of protein which is activated at constant protein concentration decreases (or remains the same) then the arrow in the right hand column points down (total amount of activated protein decreases).
- F. If one of the arrows in the left hand or central columns points up and the other points down (total amount of protein increases (decreases) or fraction of protein which is activated at constant protein concentration decreases (increases) then the arrow in the right hand column is horizontal (total amount of activated protein remains the same).

6. Between successive steps:

- A. The amount of protein activated at constant protein concentration in the succeeding step (central column) has the same direction as the total change in activated protein of the preceding step (right hand column) if the interaction connecting genes (line connecting boxes) is an activation.

- B. The amount of protein activated at constant protein concentration in the succeeding step (central column) has the opposite direction as the total change in activated protein of the preceding step (right hand column) if the interaction connecting genes (line connecting boxes) is an inhibition.
- C. If two proteins precede a protein then their interactions add according to the rules for addition of different components in the step outlined in rule 5 A-G.

### Supplementary References

1. Ihaka R & Gentleman R (1996) R: A language for data analysis and graphics. *J Computational Graphical Statistics* 5:299-314
2. Irizarry RA, *et al* (2003) Summaries of Affymetrix GeneChip probe level data. *Nucleic Acids Res* 33(Database Issue):D562-566
3. Smyth GK (2004) Linear Models and Empirical Bayes methods for assessing Differential Expression in Microarray Experiments. *Statistical Applications in Genetics and Molecular Biology* 3:Article 3, <http://www.bepress.com/sagmb/vol3/iss1/art3/>.
4. Gentleman RC, *et al* (2004) Bioconductor: open software development for computational biology and bioinformatics. *Genome Biol* 5: R80
5. Barrett T, *et al.* (2005) NCBI GEO: mining millions of expression profiles—database and tools. *Nucleic Acids Res* 33(Database issue):D562-566
6. Benjamini Y & Hochberg Y (1995) Controlling the false discovery rate; A practical and powerful approach to multiple testing. *J Roy. Stat. Soc. Ser B* 57:289-300.
7. Kanehisa M, Goto S, Kawashima S, Okuno Y & Hattori M (2004) The KEGG resource for deciphering the genome. *Nucleic Acids Res* 32(Database issue):D277-280.
8. Draghici, S., P. Khatri, A. L. Tarca, K. Amin, A. Done, C. Voichita, C. Georgescu, and R. Romero. (2007). A systems biology approach for pathway level analysis. *Genome Res* 17:1537-1545.
9. Schmidt AM, *et al.* (1992) Isolation and characterization of two binding proteins for advanced glycosylation end products from bovine lung which are present on the endothelial cell surface. *J. Biol. Chem.* 267(21): 14987-14997.
10. Hori O, *et al.* (1995) The receptor for advanced glycation end products (RAGE) is a cellular binding site for amphoterin. Mediation of neurite outgrowth and co-expression of RAGE and amphoterin in the developing nervous system. *J Biol Chem* 270(43): 25752-25761.

## Legends to Online Figures

### **Online Figure I. Deletion of RAGE suppresses diabetes-accelerated atherosclerosis and**

### **effect of diabetes and RAGE deficiency on macrophage and smooth muscle content. (A).**

Male ApoE null (N=8) and Apo E null / RAGE null mice (N=7) were rendered diabetic with streptozotocin at age 6 weeks. Mice were sacrificed at age 14 weeks and aortas were retrieved.

Mean atherosclerotic lesion area at the aortic sinus is reported; statistical considerations are indicated in the text. (B). Immunostaining and Picrosirius Red staining of atherosclerotic lesions

from the indicated ApoE null mice was performed for detection of macrophages, smooth muscle cells, T cells, and collagen (the latter using picrosirius red and polarizing microscopy) at age 24

weeks. Note that the lesions in the non-diabetic or any RAGE-deficient ApoE null mice were quite small at age 14 weeks; hence, detailed lesion characterization was performed at age 24

weeks (after 18 weeks of established hyperglycemia). Lesion areas at the aortic sinus were  $6.8 \times 10^5$  vs.  $0.9 \times 10^5 \mu\text{m}^2$  in ApoE null diabetic vs. non-diabetic ApoE null mice, respectively;

$p < 0.02$ . Lesions areas in non-diabetic ApoE null/RAGE null mice were  $0.5 \times 10^5 \mu\text{m}^2$ ;  $p < 0.05$  vs.

non-diabetic ApoE null mice. Lesion areas in diabetic ApoE null/RAGE null mice were  $3.8 \times 10^5 \mu\text{m}^2$ ;  $p < 0.05$  vs. diabetic ApoE null mice. Once we established these relationships at 24 weeks of

age, we then proceeded to analyze lesion composition. In all cases, the percent of cell type/lesion

area, or %collagen/lesion area was then calculated using Zeiss Imaging analysis program. N=5 mice/group. Error bars are standard deviations. Statistical considerations are indicated in the

figure. In B, each distinct set of bars represents the cell type or collagen content. The four bars in

each set represent the genotype and the diabetic state (\*indicates  $p < 0.03$  vs. ApoE null/RAGE

null diabetic. \*\* indicates  $p < 0.01$  vs. ApoE null/RAGE null non-diabetic. ^ indicates  $p < 0.02$  vs.

ApoE null RAGE null non-diabetic.

**Online Figure II. Venn diagram depicting the effect of diabetes and RAGE deletion in ApoE null mouse aorta.** The Venn diagram shows the intersection of comparison 1, diabetic ApoE null relative to non-diabetic ApoE null, with comparison 4, diabetic ApoE null / RAGE null relative to diabetic ApoE null. Although there are 53 genes which are statistically significantly differentially expressed in diabetic ApoE null relative to the non-diabetic ApoE null state, and 216 genes which are statistically significantly differentially expressed in diabetic ApoE null / RAGE null relative to diabetic ApoE null, only 15 of these genes are statistically significantly differentially expressed in both comparisons. Note that there is very little overlap of the genes which are differentially expressed both in the onset of diabetes in apoE null mice and in the effect of RAGE deletion in diabetic ApoE null mice.

Online Figure I

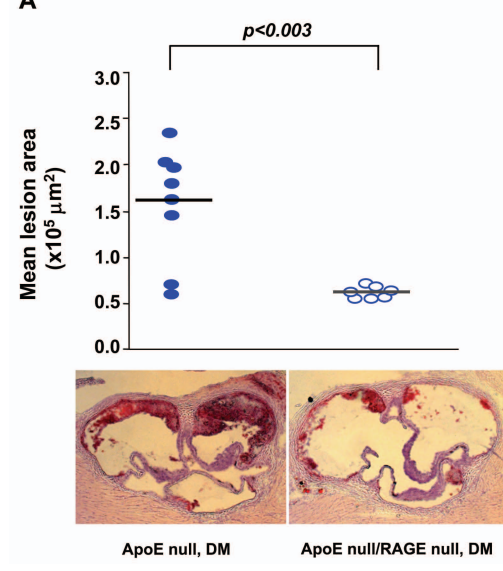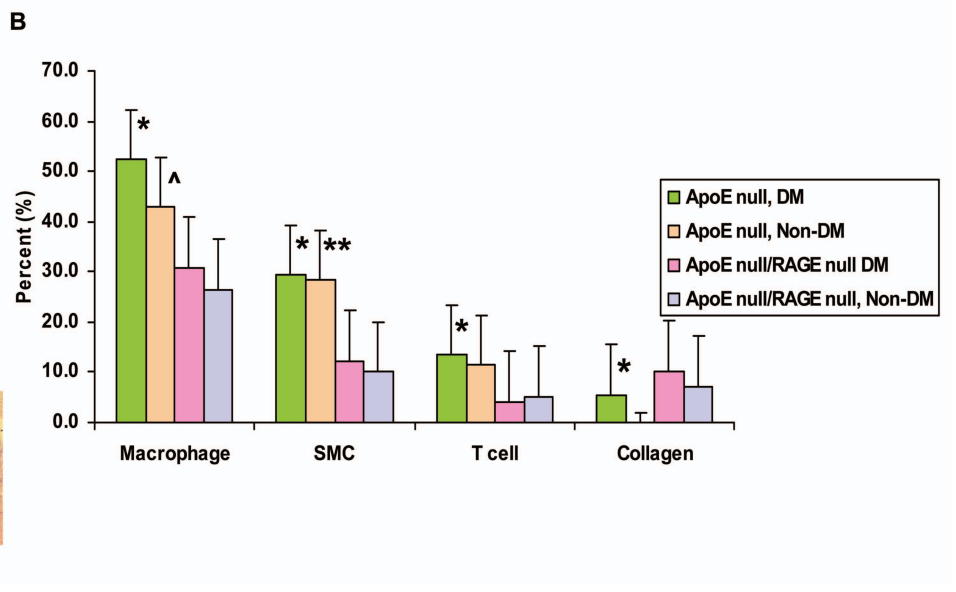

### Online Figure II

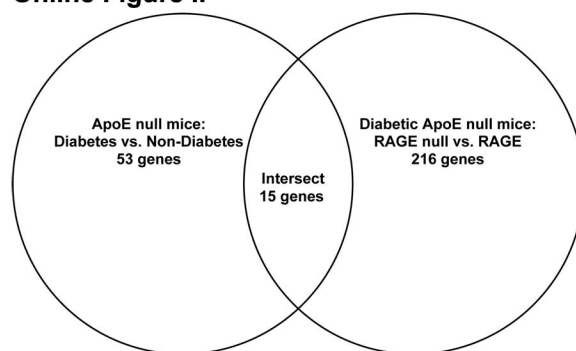



**Online Table I**

| Comparison # | Comparison                                                                                 | glucose concentration (mg/ml)   |                | Reference condition                        | 95% confidence limits reference condition | P-value glucose concentration in accordance with disease state reference condition | Experimental condition                     | 95% confidence limits experimental condition | P-value glucose concentration in accordance with disease state experimental condition |
|--------------|--------------------------------------------------------------------------------------------|---------------------------------|----------------|--------------------------------------------|-------------------------------------------|------------------------------------------------------------------------------------|--------------------------------------------|----------------------------------------------|---------------------------------------------------------------------------------------|
|              |                                                                                            | Change in glucose concentration | P-value change |                                            |                                           |                                                                                    |                                            |                                              |                                                                                       |
| 1            | Diabetic ApoE null relative to Non-diabetic ApoE null 9 weeks                              | 249.75<br>(206.07,293.42)       | 2.E-05         | Non-diabetic ApoE null 9 weeks             | 128.00<br>( 97.17,158.82)                 | 5.E-04                                                                             | Diabetic ApoE null 9 weeks                 | 377.75<br>(332.28,423.21)                    | 1.E-03                                                                                |
| 2            | Non-diabetic ApoE null / RAGE null relative to non-diabetic ApoE null 9 weeks              | 6.33<br>(-24.02,36.69)          | 1              | Non-diabetic ApoE null 9 weeks             | 128.00<br>( 97.17,158.82)                 | 5.E-04                                                                             | Non-diabetic ApoE null / RAGE null 9 weeks | 134.33<br>(106.08,162.58)                    | 2.E-03                                                                                |
| 3            | Diabetic ApoE null / RAGE null relative to non-diabetic ApoE null / RAGE null 9 weeks      | 264.16<br>(219.03,309.3)        | 8.E-05         | Non-diabetic ApoE null / RAGE null 9 weeks | 134.33<br>(106.08,162.58)                 | 2.E-03                                                                             | Diabetic ApoE null / RAGE null 9 weeks     | 398.5<br>(350.93,446.06)                     | 1.E-03                                                                                |
| 4            | Diabetic ApoE null / RAGE null relative to diabetic ApoE null 9 weeks                      | 20.7<br>(-29.86,71.36)          | 0.4            | Diabetic ApoE null 9 weeks                 | 377.75<br>(332.28,423.21)                 | 1.E-03                                                                             | Diabetic ApoE null / RAGE null 9 weeks     | 398.5<br>(350.93,446.06)                     | 1.E-03                                                                                |
| 5            | Diabetic ApoE null 14 weeks relative to Diabetic ApoE null 9 weeks                         | -32<br>(-75.60,11.60)           | 0.1            | Diabetic ApoE null 9 weeks                 | 377.75<br>(332.28,423.21)                 | 1.E-03                                                                             | Diabetic ApoE null 14 weeks                | 345.75<br>(318.18,373.32)                    | 4.E-05                                                                                |
| 6            | Diabetic ApoE null / RAGE null 14 weeks relative to Diabetic ApoE null / RAGE null 9 weeks | -60.21<br>(-104.57,-15.85)      | 2.E-02         | Diabetic ApoE null / RAGE null 9 weeks     | 398.5<br>(350.93,446.06)                  | 1.E-03                                                                             | Diabetic ApoE null / RAGE null 14 weeks    | 338.28<br>(315.25, 361.3186)                 | 8.E-05                                                                                |
| 7            | Diabetic ApoE null / RAGE null 14 weeks relative to Diabetic ApoE null 14 weeks            | -7.46<br>(-39.89,24.96)         | 0.6            | Diabetic ApoE null 14 weeks                | 345.75<br>(318.18,373.32)                 | 4.E-05                                                                             | Diabetic ApoE null / RAGE null 14 weeks    | 338.28<br>(315.25, 361.3186)                 | 8.E-05                                                                                |

**Online Table II**

Weight of mice (gm)

| Condition                                  | 95% confidence limits |
|--------------------------------------------|-----------------------|
| Non-diabetic ApoE null 9 weeks             | 22.96(20.88,25.03)    |
| Diabetic ApoE null 9 weeks                 | 20.36(17.79,22.93)    |
| Non-diabetic ApoE null / RAGE null 9 weeks | 17.97(17.47,18.47)    |
| Diabetic ApoE null / RAGE null 9 weeks     | 18.56(16.95,20.17)    |
| Diabetic ApoE null 14 weeks                | 22.67(22.26, 23.08)   |
| Diabetic ApoE null / RAGE null 14 weeks    | 21.65(21.06,22.24)    |

| <b>Online Table III</b> |                                                                                            | Cholesterol Concentration (mmol/L) |                |                                            |                                           |                                            |                                              |
|-------------------------|--------------------------------------------------------------------------------------------|------------------------------------|----------------|--------------------------------------------|-------------------------------------------|--------------------------------------------|----------------------------------------------|
| comparison #            | Comparison                                                                                 | Change in concentration            | P-value change | Reference condition                        | 95% confidence limits reference condition | Experimental condition                     | 95% confidence limits experimental condition |
| 1                       | Diabetic ApoE null relative to Non-diabetic ApoE null 9 weeks                              | 0.03<br>(-1.43,1.51)               | 0.9            | Non-diabetic ApoE null 9 weeks             | 10.11<br>(8.72, 11.50)                    | Diabetic ApoE null 9 weeks                 | 10.15<br>(8.83,11.46)                        |
| 2                       | Non-diabetic ApoE null / RAGE null relative to non-diabetic ApoE null 9 weeks              | 0.90<br>(-1.30,3.10)               | 0.3            | Non-diabetic ApoE null 9 weeks             | 10.11<br>(8.72, 11.50)                    | Non-diabetic ApoE null / RAGE null 9 weeks | 11.01<br>(8.26,13.76)                        |
| 3                       | Diabetic ApoE null / RAGE null relative to non-diabetic ApoE null / RAGE null 9 weeks      | -0.66<br>(0.4,1.55)                | 0.4            | Non-diabetic ApoE null / RAGE null 9 weeks | 11.01<br>(8.26,13.76)                     | Diabetic ApoE null / RAGE null 9 weeks     | 10.35<br>(8.76,11.93)                        |
| 4                       | Diabetic ApoE null / RAGE null relative to diabetic ApoE null 9 weeks                      | 0.20<br>(-1.39, 1.79)              | 0.7            | Diabetic ApoE null 9 weeks                 | 10.15<br>(8.83,11.46)                     | Diabetic ApoE null / RAGE null 9 weeks     | 10.35<br>(8.76,11.93)                        |
| 5                       | Diabetic ApoE null 14 weeks relative to Diabetic ApoE null 9 weeks                         | 0.35<br>(-0.87,1.58)               | 0.4            | Diabetic ApoE null 9 weeks                 | 10.15<br>(8.83,11.46)                     | Diabetic ApoE null 14 weeks                | 10.99<br>(10.16,11.82)                       |
| 6                       | Diabetic ApoE null / RAGE null 14 weeks relative to Diabetic ApoE null / RAGE null 9 weeks | 0.64<br>(-0.84,2.13)               | 0.3            | Diabetic ApoE null / RAGE null 9 weeks     | 10.35<br>(8.76,11.93)                     | Diabetic ApoE null / RAGE null 14 weeks    | 10.50<br>(10.05,10.95)                       |
| 7                       | Diabetic ApoE null / RAGE null 14 weeks relative to Diabetic ApoE null 14 weeks            | 0.49<br>(-0.38,1.36)               | 0.2            | Diabetic ApoE null 14 weeks                | 10.99<br>(10.16,11.82)                    | Diabetic ApoE null / RAGE null 14 weeks    | 10.50<br>(10.05,10.95)                       |

**Online Table IV.** Differentially Expressed Genes in Diabetic ApoE null Relative to Non-Diabetic ApoE null mice

| Affymetrix ID | Gene Symbol   | Gene Name                                                                       | log <sub>2</sub><br>FC | B    |
|---------------|---------------|---------------------------------------------------------------------------------|------------------------|------|
| 1423828_at    | Fasn          | fatty acid synthase                                                             | -2.33                  | 4.36 |
| 1417877_at    | 2310005P05Rik | RIKEN cDNA 2310005P05 gene                                                      | -0.63                  | 2.96 |
| 1424542_at    | S100a4        | S100 calcium binding protein A4                                                 | 0.88                   | 2.34 |
| 1416288_at    | Dnaja1        | DnaJ (Hsp40) homolog, subfamily A, member 1                                     | 0.76                   | 2.29 |
| 1425993_a_at  | Hsp110        | heat shock protein 110                                                          | 1.12                   | 2.05 |
| 1419359_at    | Hexim1        | hexamethylene bis-acetamide inducible 1                                         | 0.51                   | 2.05 |
| 1434185_at    | Acaca         | acetyl-Coenzyme A carboxylase alpha                                             | -1.57                  | 1.81 |
| 1460179_at    | Dnaja1        | DnaJ (Hsp40) homolog, subfamily A, member 1                                     | 0.69                   | 1.71 |
| 1460645_at    | Chordc1       | cysteine and histidine-rich domain (CHORD)-containing, zinc-binding protein 1   | 0.48                   | 1.62 |
| 1416872_at    | Tspan6        | tetraspanin 6                                                                   | 0.70                   | 1.61 |
| 1427127_x_at  | Hspa1b        | heat shock protein 1B                                                           | 1.49                   | 1.56 |
| 1460302_at    | Thbs1         | thrombospondin 1                                                                | 1.32                   | 1.50 |
| 1423566_a_at  | Hsp110        | heat shock protein 110                                                          | 1.41                   | 1.50 |
| 1437218_at    | Fn1           | fibronectin 1                                                                   | 0.76                   | 1.42 |
| 1460011_at    | Cyp26b1       | cytochrome P450, family 26, subfamily b, polypeptide 1                          | 0.70                   | 1.40 |
| 1428190_at    | Slc25a1       | solute carrier family 25 (mitochondrial carrier, citrate transporter), member 1 | -1.37                  | 1.30 |
| 1456081_a_at  | Aacs          | acetoacetyl-CoA synthetase                                                      | -1.13                  | 1.24 |
| 1428219_at    | Rybp          | RING1 and YY1 binding protein                                                   | 0.56                   | 1.24 |
| 1452318_a_at  | Hspa1b        | heat shock protein 1B                                                           | 1.27                   | 1.10 |
| 1439200_x_at  | NA            | NA                                                                              | -1.75                  | 1.00 |
| 1431802_a_at  | D5Wsu178e     | DNA segment, Chr 5, Wayne State University 178, expressed                       | 0.40                   | 0.99 |
| 1428973_s_at  | 0610012D17Rik | RIKEN cDNA 0610012D17 gene                                                      | 0.53                   | 0.98 |
| 1422478_a_at  | Acss2         | acyl-CoA synthetase short-chain family member 2                                 | -1.63                  | 0.95 |
| 1423797_at    | Aacs          | acetoacetyl-CoA synthetase                                                      | -1.22                  | 0.95 |
| 1427126_at    | Hspa1b        | heat shock protein 1B                                                           | 1.77                   | 0.94 |
| 1448501_at    | Tspan6        | tetraspanin 6                                                                   | 0.76                   | 0.94 |
| 1451979_at    | Kras          | v-Ki-ras2 Kirsten rat sarcoma viral oncogene homolog                            | 0.43                   | 0.93 |
| 1435337_at    | Tshz3         | teashirt zinc finger family member 3                                            | 0.59                   | 0.88 |
| 1424737_at    | Thrsp         | thyroid hormone responsive SPOT14 homolog (Rattus)                              | -1.16                  | 0.88 |
| 1450541_at    | Pvt1          | plasmacytoma variant translocation 1                                            | 0.54                   | 0.88 |
| 1415860_at    | Kpna2         | karyopherin (importin) alpha 2                                                  | 0.53                   | 0.79 |
| 1459874_s_at  | Mtmt4         | myotubularin related protein 4                                                  | 0.63                   | 0.79 |
| 1448531_at    | Lmnb2         | lamin B2                                                                        | 0.50                   | 0.75 |

|              |               |                                                                                          |       |      |
|--------------|---------------|------------------------------------------------------------------------------------------|-------|------|
| 1416563_at   | Ctps          | cytidine 5'-triphosphate synthase                                                        | 0.73  | 0.74 |
| 1416529_at   | Emp1          | epithelial membrane protein 1                                                            | 0.64  | 0.68 |
| 1452805_at   | D11Wsu47e     | DNA segment, Chr 11, Wayne State University 47, expressed                                | 0.42  | 0.62 |
| 1449609_at   | NA            | NA                                                                                       | -0.40 | 0.61 |
| 1449528_at   | Figf          | c-fos induced growth factor                                                              | 0.61  | 0.59 |
| 1418659_at   | Tparl         | TPA regulated locus                                                                      | 0.59  | 0.54 |
| 1452619_a_at | Agbl3         | ATP/GTP binding protein-like 3                                                           | -0.43 | 0.51 |
| 1449044_at   | Eef1e1        | eukaryotic translation elongation factor 1 epsilon 1                                     | 0.65  | 0.48 |
| 1418322_at   | Creml         | cAMP responsive element modulator                                                        | 0.61  | 0.48 |
| 1452406_x_at | Erdr1         | erythroid differentiation regulator 1                                                    | -1.43 | 0.46 |
| 1439443_x_at | Tkt           | transketolase                                                                            | -0.79 | 0.43 |
| 1451015_at   | Tkt           | transketolase                                                                            | -1.16 | 0.39 |
| 1447476_at   | NA            | NA                                                                                       | -0.37 | 0.39 |
| 1417196_s_at | Wwc2          | WW, C2 and coiled-coil domain containing 2                                               | 0.51  | 0.37 |
| 1435484_at   | BF642829      | expressed sequence BF642829                                                              | 0.80  | 0.37 |
| 1428989_at   | 0710001D07Rik | RIKEN cDNA 0710001D07 gene                                                               | -0.84 | 0.36 |
| 1417741_at   | Pygl          | liver glycogen phosphorylase                                                             | -1.48 | 0.35 |
| 1435294_at   | Mtmr11        | myotubularin related protein 11                                                          | -0.37 | 0.30 |
| 1460330_at   | Anxa3         | annexin A3                                                                               | 0.62  | 0.29 |
| 1428944_at   | Ube1l2        | ubiquitin-activating enzyme E1-like 2                                                    | 0.45  | 0.26 |
| 1416632_at   | Mod1          | malic enzyme, supernatant                                                                | -1.20 | 0.25 |
| 1451666_at   | Acly          | ATP citrate lyase                                                                        | -1.55 | 0.23 |
| 1454991_at   | Slc7a1        | solute carrier family 7 (cationic amino acid transporter, y+ system), member 1           | 0.61  | 0.22 |
| 1456626_a_at | 1110005A23Rik | RIKEN cDNA 1110005A23 gene                                                               | 0.41  | 0.21 |
| 1422479_at   | Acss2         | acyl-CoA synthetase short-chain family member 2                                          | -1.57 | 0.19 |
| 1452433_at   | NA            | NA                                                                                       | -0.46 | 0.18 |
| 1454993_a_at | Sfrs3         | splicing factor, arginine/serine-rich 3 (SRp20)                                          | 0.46  | 0.16 |
| 1425326_at   | Acly          | ATP citrate lyase                                                                        | -1.86 | 0.15 |
| 1418119_at   | Rbm8a         | RNA binding motif protein 8a                                                             | 0.41  | 0.14 |
| 1433897_at   | AI597468      | expressed sequence AI597468                                                              | 0.58  | 0.12 |
| 1460583_at   | Golt1b        | golgi transport 1 homolog B (S. cerevisiae)                                              | 0.48  | 0.12 |
| 1416629_at   | Slc1a5        | solute carrier family 1 (neutral amino acid transporter), member 5                       | -0.59 | 0.11 |
| 1423796_at   | Sfpq          | splicing factor proline/glutamine rich (polypyrimidine tract binding protein associated) | 0.71  | 0.10 |
| 1435902_at   | Nudt18        | nudix (nucleoside diphosphate linked moiety X)-type motif 18                             | -0.41 | 0.09 |
| 1417460_at   | lfitm2        | interferon induced transmembrane protein 2                                               | 0.39  | 0.09 |
| 1450958_at   | Tm4sf1        | transmembrane 4 superfamily member 1                                                     | 0.64  | 0.09 |

|              |         |                                                                                 |       |      |
|--------------|---------|---------------------------------------------------------------------------------|-------|------|
| 1459835_s_at | Reln    | reelin                                                                          | 0.67  | 0.07 |
| 1436338_at   | Ppp2r1b | protein phosphatase 2 (formerly 2A), regulatory subunit A (PR 65), beta isoform | -0.53 | 0.05 |
| 1440899_at   | Fmo5    | flavin containing monooxygenase 5                                               | -0.48 | 0.05 |
| 1444560_at   | NA      | NA                                                                              | 0.49  | 0.05 |
| 1425137_a_at | H2-Q10  | histocompatibility 2, Q region locus 10                                         | -1.34 | 0.04 |
| 1445894_at   | NA      | NA                                                                              | 0.42  | 0.03 |
| 1427052_at   | Acacb   | acetyl-Coenzyme A carboxylase beta                                              | -1.59 | 0.01 |

**Online Table V.** Differentially Expressed Genes in Diabetic ApoE null/RAGE null Relative to Diabetic ApoE null mice

| Affymetrix ID | Gene Symbol   | Gene Name                                                                     | log <sub>2</sub> FC | B    |
|---------------|---------------|-------------------------------------------------------------------------------|---------------------|------|
| 1452707_at    | 4631423F02Rik | RIKEN cDNA 4631423F02 gene                                                    | -1.23               | 4.90 |
| 1439200_x_at  | NA            | NA                                                                            | 2.45                | 4.43 |
| 1421834_at    | Pip5k1a       | phosphatidylinositol-4-phosphate 5-kinase, type 1 alpha                       | -0.82               | 4.28 |
| 1431413_at    | Ramp1         | receptor (calcitonin) activity modifying protein 1                            | -0.77               | 4.07 |
| 1435606_at    | Gal3st4       | galactose-3-O-sulfotransferase 4                                              | -0.84               | 4.05 |
| 1460583_at    | Golt1b        | golgi transport 1 homolog B ( <i>S. cerevisiae</i> )                          | -0.73               | 4.03 |
| 1447886_at    | 0610040B09Rik | RIKEN cDNA 0610040B09 gene                                                    | -0.80               | 3.81 |
| 1419431_at    | Ereg          | epiregulin                                                                    | -1.52               | 3.77 |
| 1450742_at    | Bysl          | bystin-like                                                                   | -0.72               | 3.76 |
| 1426319_at    | Pdgfd         | platelet-derived growth factor, D polypeptide                                 | -1.24               | 3.67 |
| 1416121_at    | Lox           | lysyl oxidase                                                                 | -0.96               | 3.62 |
| 1452406_x_at  | Erdr1         | erythroid differentiation regulator 1                                         | 1.96                | 3.56 |
| 1418322_at    | Crem          | cAMP responsive element modulator                                             | -0.84               | 3.52 |
| 1456791_at    | AA407452      | EST AA407452                                                                  | -0.50               | 3.35 |
| 1439849_at    | NA            | NA                                                                            | -0.67               | 3.28 |
| 1425425_a_at  | Wif1          | Wnt inhibitory factor 1                                                       | -1.55               | 3.21 |
| 1447490_at    | NA            | NA                                                                            | -1.49               | 3.20 |
| 1423250_a_at  | Tgfb2         | transforming growth factor, beta 2                                            | -1.12               | 3.19 |
| 1418572_x_at  | Tnfrsf12a     | tumor necrosis factor receptor superfamily, member 12a                        | -1.41               | 3.13 |
| 1437498_at    | NA            | NA                                                                            | -0.50               | 3.06 |
| 1436002_at    | C230013L11Rik | RIKEN cDNA C230013L11 gene                                                    | -1.45               | 3.04 |
| 1429637_at    | 2210419I08Rik | RIKEN cDNA 2210419I08 gene                                                    | -1.14               | 2.88 |
| 1458573_at    | 9530026P05Rik | RIKEN cDNA 9530026P05 gene                                                    | 0.88                | 2.84 |
| 1417430_at    | Cdr2          | cerebellar degeneration-related 2                                             | -0.99               | 2.77 |
| 1456532_at    | Pdgfd         | platelet-derived growth factor, D polypeptide                                 | -0.81               | 2.71 |
| 1460645_at    | Chordc1       | cysteine and histidine-rich domain (CHORD)-containing, zinc-binding protein 1 | -0.51               | 2.70 |
| 1424373_at    | Armcx3        | armadillo repeat containing, X-linked 3                                       | -0.46               | 2.68 |
| 1448501_at    | Tspan6        | tetraspanin 6                                                                 | -0.89               | 2.66 |
| 1427127_x_at  | Hspa1b        | heat shock protein 1B                                                         | -1.59               | 2.57 |
| 1439779_at    | NA            | NA                                                                            | 0.56                | 2.55 |
| 1429564_at    | Pcgf5         | polycomb group ring finger 5                                                  | -0.69               | 2.52 |
| 1435337_at    | Tshz3         | teashirt zinc finger family member 3                                          | -0.68               | 2.50 |
| 1440534_at    | NA            | NA                                                                            | -1.20               | 2.50 |
| 1419149_at    | Serpine1      | serine (or cysteine) peptidase inhibitor, clade E, member 1                   | -1.88               | 2.47 |
| 1452318_a_at  | Hspa1b        | heat shock protein 1B                                                         | -1.41               | 2.42 |
| 1422307_at    | NA            | NA                                                                            | -0.47               | 2.38 |
| 1452284_at    | Ptprz1        | protein tyrosine phosphatase, receptor type Z, polypeptide 1                  | -1.20               | 2.36 |
| 1422587_at    | Tmem45a       | transmembrane protein 45a                                                     | -0.77               | 2.36 |
| 1460011_at    | Cyp26b1       | cytochrome P450, family 26, subfamily b, polypeptide 1                        | -0.75               | 2.32 |
| 1424483_at    | Mobk1b        | MOB1, Mps One Binder kinase activator-like 1B (yeast)                         | -0.39               | 2.28 |

|              |               |                                                                                                |       |      |
|--------------|---------------|------------------------------------------------------------------------------------------------|-------|------|
| 1433651_at   | Wtip          | WT1-interacting protein                                                                        | -0.74 | 2.28 |
| 1446541_at   | 4930434E21Rik | RIKEN cDNA 4930434E21 gene                                                                     | -0.76 | 2.27 |
| 1448201_at   | Sfrp2         | secreted frizzled-related protein 2                                                            | -1.20 | 2.26 |
| 1433481_at   | Fkbp14        | FK506 binding protein 14                                                                       | -0.79 | 2.23 |
| 1434572_at   | Hdac9         | histone deacetylase 9                                                                          | -1.05 | 2.23 |
| 1433897_at   | AI597468      | expressed sequence AI597468                                                                    | -0.72 | 2.12 |
| 1448892_at   | Dock7         | dedicator of cytokinesis 7                                                                     | -0.73 | 2.12 |
| 1418571_at   | Tnfrsf12a     | tumor necrosis factor receptor superfamily, member 12a                                         | -1.22 | 2.11 |
| 1435106_at   | 3732412D22Rik | RIKEN cDNA 3732412D22 gene                                                                     | -0.81 | 2.11 |
| 1430798_x_at | Mrpl15        | mitochondrial ribosomal protein L15                                                            | 0.81  | 2.08 |
| 1448487_at   | Lrrfip1       | leucine rich repeat (in FLII) interacting protein 1                                            | -0.80 | 2.07 |
| 1427484_at   | Eml5          | echinoderm microtubule associated protein like 5                                               | 0.63  | 2.06 |
| 1420696_at   | Sema3c        | sema domain, immunoglobulin domain (Ig), short basic domain, secreted, (semaphorin) 3C         | -0.89 | 2.05 |
| 1452257_at   | Bdh1          | 3-hydroxybutyrate dehydrogenase, type 1                                                        | -0.90 | 2.04 |
| 1425185_at   | 5830417C01Rik | RIKEN cDNA 5830417C01 gene                                                                     | -0.50 | 2.04 |
| 1435248_a_at | Btaf1         | BTA1 RNA polymerase II, B-TFIID transcription factor-associated, (Mot1 homolog, S. cerevisiae) | -0.48 | 2.04 |
| 1416288_at   | Dnaja1        | DnaJ (Hsp40) homolog, subfamily A, member 1                                                    | -0.70 | 2.03 |
| 1449065_at   | Acot1         | acyl-CoA thioesterase 1                                                                        | 1.26  | 2.02 |
| 1428910_at   | 2310022B05Rik | RIKEN cDNA 2310022B05 gene                                                                     | -0.82 | 2.02 |
| 1450389_s_at | Pip5k1a       | phosphatidylinositol-4-phosphate 5-kinase, type 1 alpha                                        | -0.68 | 1.94 |
| 1435473_at   | Gm347         | gene model 347, (NCBI)                                                                         | -0.64 | 1.93 |
| 1440215_at   | C130086A10    | NA                                                                                             | -0.79 | 1.93 |
| 1420688_a_at | Sgce          | sarcoglycan, epsilon                                                                           | -0.50 | 1.92 |
| 1438328_at   | Hcfc2         | host cell factor C2                                                                            | -0.63 | 1.92 |
| 1448228_at   | Lox           | lysyl oxidase                                                                                  | -0.92 | 1.91 |
| 1448648_at   | 9130005N14Rik | RIKEN cDNA 9130005N14 gene                                                                     | -0.88 | 1.87 |
| 1448468_a_at | Kcnab1        | potassium voltage-gated channel, shaker-related subfamily, beta member 1                       | -0.95 | 1.86 |
| 1427448_at   | Rabep1        | rabaptin, RAB GTPase binding effector protein 1                                                | -0.39 | 1.86 |
| 1435574_at   | NA            | NA                                                                                             | -0.88 | 1.85 |
| 1418852_at   | Chrna1        | cholinergic receptor, nicotinic, alpha polypeptide 1 (muscle)                                  | -0.84 | 1.82 |
| 1427126_at   | Hspa1b        | heat shock protein 1B                                                                          | -1.88 | 1.81 |
| 1417877_at   | 2310005P05Rik | RIKEN cDNA 2310005P05 gene                                                                     | 0.52  | 1.80 |
| 1439089_at   | Zbtb41        | zinc finger and BTB domain containing 41 homolog                                               | -0.49 | 1.79 |
| 1419595_a_at | Ggh           | gamma-glutamyl hydrolase                                                                       | -0.51 | 1.79 |
| 1421624_a_at | Enah          | enabled homolog (Drosophila)                                                                   | -1.00 | 1.77 |
| 1456483_at   | Zfp9          | zinc finger protein 9                                                                          | -0.73 | 1.77 |
| 1451240_a_at | Glo1          | glyoxalase 1                                                                                   | 0.81  | 1.76 |
| 1426306_a_at | Maged2        | melanoma antigen, family D, 2                                                                  | -0.84 | 1.76 |
| 1436319_at   | Sulf1         | sulfatase 1                                                                                    | -0.73 | 1.74 |
| 1444418_at   | NA            | NA                                                                                             | 0.60  | 1.72 |
| 1421833_at   | Pip5k1a       | phosphatidylinositol-4-phosphate 5-kinase, type 1 alpha                                        | -0.50 | 1.72 |



|              |               |                                                                                   |       |      |
|--------------|---------------|-----------------------------------------------------------------------------------|-------|------|
| 1427019_at   | Ptprz1        | protein tyrosine phosphatase, receptor type Z, polypeptide 1                      | -0.99 | 1.70 |
| 1424607_a_at | Xdh           | xanthine dehydrogenase                                                            | 0.59  | 1.69 |
| 1429417_at   | 4833446K15Rik | RIKEN cDNA 4833446K15 gene                                                        | -1.18 | 1.67 |
| 1418349_at   | Hbegf         | heparin-binding EGF-like growth factor                                            | -1.28 | 1.66 |
| 1434316_at   | Chsy1         | carbohydrate (chondroitin) synthase 1                                             | -0.82 | 1.64 |
| 1460080_at   | AI645535      | expressed sequence AI645535                                                       | -0.55 | 1.63 |
| 1428638_at   | Efhc2         | EF-hand domain (C-terminal) containing 2                                          | -1.07 | 1.62 |
| 1433529_at   | E430002G05Rik | RIKEN cDNA E430002G05 gene                                                        | -0.92 | 1.61 |
| 1450416_at   | Cbx5          | chromobox homolog 5 (Drosophila HP1a)                                             | -0.51 | 1.60 |
| 1426782_at   | Gpr125        | G protein-coupled receptor 125                                                    | -0.65 | 1.59 |
| 1423347_at   | Sec23a        | SEC23A ( <i>S. cerevisiae</i> )                                                   | -0.55 | 1.55 |
| 1452388_at   | Hspa1a        | heat shock protein 1A                                                             | -1.68 | 1.53 |
| 1434158_at   | Gmds          | GDP-mannose 4, 6-dehydratase                                                      | -0.52 | 1.53 |
| 1425806_a_at | Surb7         | SRB7 (suppressor of RNA polymerase B) homolog ( <i>S. cerevisiae</i> )            | -0.43 | 1.52 |
| 1452238_at   | Hrb           | HIV-1 Rev binding protein                                                         | -0.55 | 1.52 |
| 1449584_at   | Dgkg          | diacylglycerol kinase, gamma                                                      | -0.75 | 1.49 |
| 1429888_a_at | Hspb2         | heat shock protein 2                                                              | -0.92 | 1.49 |
| 1418538_at   | Kdelr3        | KDEL (Lys-Asp-Glu-Leu) endoplasmic reticulum protein retention receptor 3         | -0.77 | 1.47 |
| 1436826_at   | Tmtc3         | transmembrane and tetratricopeptide repeat containing 3                           | -0.51 | 1.46 |
| 1452093_at   | 2500001K11Rik | RIKEN cDNA 2500001K11 gene                                                        | -0.52 | 1.45 |
| 1418964_at   | Pigm          | phosphatidylinositol glycan, class M                                              | -0.69 | 1.45 |
| 1427475_a_at | NA            | NA                                                                                | -0.70 | 1.44 |
| 1443939_at   | LOC230628     | NA                                                                                | -0.61 | 1.41 |
| 1450029_s_at | Itga9         | integrin alpha 9                                                                  | -1.00 | 1.41 |
| 1441989_at   | Bnip2         | BCL2/adenovirus E1B interacting protein 1, NIP2                                   | -0.69 | 1.40 |
| 1417730_at   | Ext1          | exostoses (multiple) 1                                                            | -0.61 | 1.37 |
| 1458719_at   | Glp1r         | glucagon-like peptide 1 receptor                                                  | 1.91  | 1.36 |
| 1429232_at   | 2610528B01Rik | RIKEN cDNA 2610528B01 gene                                                        | -0.48 | 1.35 |
| 1432417_a_at | Tspan2        | tetraspanin 2                                                                     | -1.09 | 1.33 |
| 1438004_at   | Pols          | polymerase (DNA directed) sigma                                                   | -0.82 | 1.30 |
| 1418802_at   | R74862        | expressed sequence R74862                                                         | -0.41 | 1.30 |
| 1422118_at   | Sync          | syncoilin                                                                         | -0.78 | 1.29 |
| 1447547_at   | Ltbp1         | latent transforming growth factor beta binding protein 1                          | -1.31 | 1.28 |
| 1455316_x_at | Ccrn4l        | CCR4 carbon catabolite repression 4-like ( <i>S. cerevisiae</i> )                 | 0.57  | 1.28 |
| 1417272_at   | 9130005N14Rik | RIKEN cDNA 9130005N14 gene                                                        | -0.60 | 1.28 |
| 1444396_at   | Trp53inp2     | tumor protein p53 inducible nuclear protein 2                                     | 0.65  | 1.27 |
| 1456823_at   | Gm70          | gene model 70, (NCBI)                                                             | -0.73 | 1.26 |
| 1422862_at   | Pdlim5        | PDZ and LIM domain 5                                                              | -0.85 | 1.24 |
| 1437523_s_at | Sgcg          | sarcoglycan, gamma (dystrophin-associated glycoprotein)                           | -0.83 | 1.24 |
| 1457092_at   | C630007B19Rik | RIKEN cDNA C630007B19 gene                                                        | -1.15 | 1.24 |
| 1422772_at   | C1galt1       | core 1 UDP-galactose:N-acetylgalactosamine-alpha-R beta 1,3-galactosyltransferase | -0.88 | 1.20 |
| 1449063_at   | Sec22l1       | SEC22 vesicle trafficking protein-like 1 ( <i>S. cerevisiae</i> )                 | -0.40 | 1.20 |

|              |               |                                                                                |       |      |
|--------------|---------------|--------------------------------------------------------------------------------|-------|------|
| 1436101_at   | Pank2         | pantothenate kinase 2 (Hallervorden-Spatz syndrome)                            | -0.74 | 1.20 |
| 1429065_at   | 1200009F10Rik | RIKEN cDNA 1200009F10 gene                                                     | -0.79 | 1.19 |
| 1438566_at   | St8sia6       | ST8 alpha-N-acetyl-neuraminide alpha-2,8-sialyltransferase 6                   | 0.43  | 1.19 |
| 1419667_at   | Sgcb          | sarcoglycan, beta (dystrophin-associated glycoprotein)                         | -0.55 | 1.16 |
| 1427560_at   | Six5          | sine oculis-related homeobox 5 homolog (Drosophila)                            | -0.45 | 1.16 |
| 1424609_a_at | Xdh           | xanthine dehydrogenase                                                         | 0.57  | 1.15 |
| 1431693_a_at | Il17b         | interleukin 17B                                                                | -0.73 | 1.14 |
| 1457817_at   | Bcas3         | breast carcinoma amplified sequence 3                                          | 0.56  | 1.12 |
| 1435878_at   | Stk38l        | serine/threonine kinase 38 like                                                | -0.82 | 1.12 |
| 1453172_at   | Stch          | stress 70 protein chaperone, microsome-associated, human homolog               | -0.51 | 1.12 |
| 1417866_at   | Tnfaip1       | tumor necrosis factor, alpha-induced protein 1 (endothelial)                   | -0.38 | 1.08 |
| 1455197_at   | Rnd1          | Rho family GTPase 1                                                            | -0.65 | 1.08 |
| 1423824_at   | Gpr177        | G protein-coupled receptor 177                                                 | -0.75 | 1.07 |
| 1454991_at   | Slc7a1        | solute carrier family 7 (cationic amino acid transporter, y+ system), member 1 | -0.65 | 1.06 |
| 1439817_at   | 2900064A13Rik | RIKEN cDNA 2900064A13 gene                                                     | -0.51 | 1.06 |
| 1417205_at   | Kdelr2        | KDEL (Lys-Asp-Glu-Leu) endoplasmic reticulum protein retention receptor 2      | -0.63 | 1.06 |
| 1440435_at   | Ky            | kyphoscoliosis peptidase                                                       | -1.17 | 1.06 |
| 1450243_a_at | Dscr111       | Down syndrome critical region gene 1-like 1                                    | -1.60 | 1.02 |
| 1453087_at   | 6330403L08Rik | RIKEN cDNA 6330403L08 gene                                                     | -0.72 | 1.01 |
| 1434883_at   | Mtdh          | Metadherin                                                                     | -0.62 | 1.01 |
| 1426755_at   | Ckap4         | cytoskeleton-associated protein 4                                              | -0.63 | 1.00 |
| 1450922_a_at | Tgfb2         | transforming growth factor, beta 2                                             | -1.25 | 0.99 |
| 1436203_a_at | 1110059G02Rik | RIKEN cDNA 1110059G02 gene                                                     | -0.92 | 0.97 |
| 1445421_at   | NA            | NA                                                                             | -0.67 | 0.96 |
| 1421012_at   | Srprb         | signal recognition particle receptor, B subunit                                | -0.36 | 0.95 |
| 1428896_at   | Pdgfrl        | platelet-derived growth factor receptor-like                                   | -0.75 | 0.92 |
| 1445848_at   | LOC384500     | NA                                                                             | 0.81  | 0.92 |
| 1448682_at   | Dynll1        | dynein light chain LC8-type 1                                                  | -0.64 | 0.92 |
| 1419015_at   | Wisp2         | WNT1 inducible signaling pathway protein 2                                     | -0.82 | 0.92 |
| 1448556_at   | Prlr          | prolactin receptor                                                             | 0.67  | 0.91 |
| 1423405_at   | Timp4         | tissue inhibitor of metalloproteinase 4                                        | 0.91  | 0.91 |
| 1424542_at   | S100a4        | S100 calcium binding protein A4                                                | -0.71 | 0.90 |
| 1422437_at   | Col5a2        | procollagen, type V, alpha 2                                                   | -0.71 | 0.89 |
| 1431714_at   | 2310015D24Rik | RIKEN cDNA 2310015D24 gene                                                     | -0.82 | 0.88 |
| 1452740_at   | Myh10         | myosin, heavy polypeptide 10, non-muscle                                       | -0.85 | 0.88 |
| 1435985_at   | Stk25         | serine/threonine kinase 25 (yeast)                                             | -0.54 | 0.85 |
| 1460302_at   | Thbs1         | thrombospondin 1                                                               | -1.17 | 0.84 |
| 1429508_at   | 2310057M21Rik | RIKEN cDNA 2310057M21 gene                                                     | -0.64 | 0.84 |
| 1458566_at   | Gpatc2        | G patch domain containing 2                                                    | 0.54  | 0.83 |
| 1449096_at   | 0610011N22Rik | RIKEN cDNA 0610011N22 gene                                                     | -0.55 | 0.83 |
| 1437902_s_at | Lrrc61        | leucine rich repeat containing 61                                              | -0.51 | 0.82 |
| 1416174_at   | Rbbp9         | retinoblastoma binding protein 9                                               | -0.43 | 0.82 |

|              |               |                                                                         |       |      |
|--------------|---------------|-------------------------------------------------------------------------|-------|------|
| 1433934_at   | Sec24a        | SEC24 related gene family, member A ( <i>S. cerevisiae</i> )            | -0.42 | 0.82 |
| 1418820_s_at | Zcchc10       | zinc finger, CCHC domain containing 10                                  | -0.49 | 0.81 |
| 1416441_at   | Pgcp          | plasma glutamate carboxypeptidase                                       | -0.60 | 0.80 |
| 1451975_at   | 2810453I06Rik | RIKEN cDNA 2810453I06 gene                                              | -0.54 | 0.79 |
| 1415988_at   | Hdlbp         | high density lipoprotein (HDL) binding protein                          | -0.55 | 0.79 |
| 1448251_at   | 9030425E11Rik | RIKEN cDNA 9030425E11 gene                                              | -0.88 | 0.79 |
| 1423316_at   | Tmem39a       | transmembrane protein 39a                                               | -0.74 | 0.78 |
| 1437370_at   | Sgol2         | shugoshin-like 2 ( <i>S. pombe</i> )                                    | 0.45  | 0.76 |
| 1459495_at   | NA            | NA                                                                      | -0.50 | 0.75 |
| 1448207_at   | Lasp1         | LIM and SH3 protein 1                                                   | -0.45 | 0.75 |
| 1420636_a_at | Dusp12        | dual specificity phosphatase 12                                         | -0.42 | 0.73 |
| 1460260_s_at | Kpna1         | karyopherin (importin) alpha 1                                          | -0.39 | 0.72 |
| 1415741_at   | Tparl         | TPA regulated locus                                                     | -0.52 | 0.71 |
| 1442148_at   | Psip1         | PC4 and SFRS1 interacting protein 1                                     | -0.58 | 0.71 |
| 1454842_a_at | B3galnt2      | UDP-GalNAc:betaGlcNAc beta 1,3-galactosaminyltransferase, polypeptide 2 | -0.69 | 0.69 |
| 1416554_at   | Pdlim1        | PDZ and LIM domain 1 (elfin)                                            | -0.84 | 0.67 |
| 1442257_at   | NA            | NA                                                                      | -1.03 | 0.67 |
| 1455583_at   | Gne           | glucosamine                                                             | -0.44 | 0.67 |
| 1426468_at   | 0610037L13Rik | RIKEN cDNA 0610037L13 gene                                              | -0.36 | 0.66 |
| 1450784_at   | Reck          | reversion-inducing-cysteine-rich protein with kazal motifs              | -0.49 | 0.66 |
| 1440397_at   | Cacna2d1      | calcium channel, voltage-dependent, alpha2/delta subunit 1              | -0.70 | 0.66 |
| 1434950_a_at | Armc8         | armadillo repeat containing 8                                           | -0.41 | 0.65 |
| 1435641_at   | 9530018I07Rik | RIKEN cDNA 9530018I07 gene                                              | -0.73 | 0.64 |
| 1418455_at   | Copz2         | coatamer protein complex, subunit zeta 2                                | -0.47 | 0.63 |
| 1451629_at   | Lbh           | limb-bud and heart                                                      | -0.70 | 0.63 |
| 1450994_at   | Rock1         | Rho-associated coiled-coil forming kinase 1                             | -0.66 | 0.60 |
| 1456798_at   | 9330118A15Rik | RIKEN cDNA 9330118A15 gene                                              | -0.78 | 0.60 |
| 1430479_at   | 2010007H06Rik | RIKEN cDNA 2010007H06 gene                                              | 0.43  | 0.60 |
| 1428983_at   | Scx           | scleraxis                                                               | -0.77 | 0.60 |
| 1432494_a_at | 1700019E19Rik | RIKEN cDNA 1700019E19 gene                                              | -0.73 | 0.60 |
| 1425921_a_at | 1810055G02Rik | RIKEN cDNA 1810055G02 gene                                              | -0.66 | 0.58 |
| 1431079_at   | C1qtnf2       | C1q and tumor necrosis factor related protein 2                         | -0.81 | 0.58 |
| 1425913_a_at | 2810022L02Rik | RIKEN cDNA 2810022L02 gene                                              | -0.80 | 0.58 |
| 1437259_at   | Slc9a2        | solute carrier family 9 (sodium/hydrogen exchanger), member 2           | -0.67 | 0.57 |
| 1433670_at   | Emp2          | epithelial membrane protein 2                                           | -0.55 | 0.57 |
| 1424568_at   | Tspan2        | tetraspanin 2                                                           | -0.78 | 0.56 |
| 1450728_at   | Fjx1          | four jointed box 1 ( <i>Drosophila</i> )                                | -0.73 | 0.56 |
| 1423352_at   | Crispld1      | cysteine-rich secretory protein LCCL domain containing 1                | -0.52 | 0.56 |
| 1433543_at   | Anln          | anillin, actin binding protein (scraps homolog, <i>Drosophila</i> )     | -0.95 | 0.55 |
| 1445969_at   | NA            | NA                                                                      | -0.65 | 0.54 |
| 1418722_at   | Ngp           | neutrophilic granule protein                                            | 0.53  | 0.53 |
| 1441904_x_at | 9130005N14Rik | RIKEN cDNA 9130005N14 gene                                              | -0.63 | 0.53 |

|              |               |                                                                                                |       |      |
|--------------|---------------|------------------------------------------------------------------------------------------------|-------|------|
| 1416686_at   | Plod2         | procollagen lysine, 2-oxoglutarate 5-dioxygenase 2                                             | -0.78 | 0.53 |
| 1450943_at   | 2010012C16Rik | RIKEN cDNA 2010012C16 gene                                                                     | -0.56 | 0.53 |
| 1428219_at   | Rybp          | RING1 and YY1 binding protein                                                                  | -0.50 | 0.53 |
| 1453993_a_at | Bnip2         | BCL2/adenovirus E1B interacting protein 1, NIP2                                                | -0.55 | 0.53 |
| 1428538_s_at | Rarres2       | retinoic acid receptor responder (tazarotene induced) 2                                        | -0.57 | 0.51 |
| 1433929_at   | Nhlrc2        | NHL repeat containing 2                                                                        | -0.40 | 0.51 |
| 1418413_at   | Cav3          | caveolin 3                                                                                     | -0.75 | 0.50 |
| 1460203_at   | Itpr1         | inositol 1,4,5-triphosphate receptor 1                                                         | -0.57 | 0.49 |
| 1424556_at   | Pycr1         | pyrroline-5-carboxylate reductase 1                                                            | -0.98 | 0.49 |
| 1426540_at   | Endod1        | endonuclease domain containing 1                                                               | -0.83 | 0.48 |
| 1419169_at   | Mapk6         | mitogen-activated protein kinase 6                                                             | -0.46 | 0.48 |
| 1455294_at   | 1110029L17Rik | RIKEN cDNA 1110029L17 gene                                                                     | -0.36 | 0.48 |
| 1417104_at   | Emp3          | epithelial membrane protein 3                                                                  | -0.52 | 0.47 |
| 1452521_a_at | Plaur         | plasminogen activator, urokinase receptor                                                      | -0.59 | 0.46 |
| 1455320_at   | Pbef1         | pre-B-cell colony-enhancing factor 1                                                           | 0.76  | 0.45 |
| 1416165_at   | Rab31         | RAB31, member RAS oncogene family                                                              | -0.51 | 0.45 |
| 1422818_at   | Nedd9         | neural precursor cell expressed, developmentally down-regulated gene 9                         | -0.90 | 0.44 |
| 1437637_at   | Phtf2         | putative homeodomain transcription factor 2                                                    | -0.98 | 0.44 |
| 1418454_at   | Mfap5         | microfibrillar associated protein 5                                                            | -0.60 | 0.44 |
| 1435981_at   | NA            | NA                                                                                             | -0.70 | 0.43 |
| 1424800_at   | Enah          | enabled homolog (Drosophila)                                                                   | -0.77 | 0.43 |
| 1437101_at   | Lats2         | large tumor suppressor 2                                                                       | -0.65 | 0.43 |
| 1429823_at   | 5430420E18Rik | RIKEN cDNA 5430420E18 gene                                                                     | -0.95 | 0.42 |
| 1428668_at   | Acbd3         | acyl-Coenzyme A binding domain containing 3                                                    | -0.45 | 0.42 |
| 1427730_a_at | Zfp148        | zinc finger protein 148                                                                        | -0.34 | 0.41 |
| 1415758_at   | Fryl          | furry homolog-like (Drosophila)                                                                | -0.40 | 0.41 |
| 1443916_at   | 2900026A02Rik | RIKEN cDNA 2900026A02 gene                                                                     | -0.55 | 0.40 |
| 1443501_at   | NA            | NA                                                                                             | 0.44  | 0.40 |
| 1452094_at   | P4ha1         | procollagen-proline, 2-oxoglutarate 4-dioxygenase (proline 4-hydroxylase), alpha 1 polypeptide | -0.77 | 0.40 |
| 1423440_at   | 1110001A07Rik | RIKEN cDNA 1110001A07 gene                                                                     | -0.37 | 0.39 |
| 1423566_a_at | Hsp110        | heat shock protein 110                                                                         | -1.19 | 0.39 |
| 1417570_at   | Anapc1        | anaphase promoting complex subunit 1                                                           | -0.83 | 0.39 |
| 1431166_at   | Chd1          | chromodomain helicase DNA binding protein 1                                                    | 0.57  | 0.38 |
| 1455375_at   | NA            | NA                                                                                             | -0.84 | 0.38 |
| 1425993_a_at | Hsp110        | heat shock protein 110                                                                         | -0.88 | 0.37 |
| 1454876_at   | Rab23         | RAB23, member RAS oncogene family                                                              | -0.67 | 0.37 |
| 1424801_at   | Enah          | enabled homolog (Drosophila)                                                                   | -0.78 | 0.37 |
| 1448810_at   | Gne           | glucosamine                                                                                    | -0.37 | 0.37 |
| 1423649_at   | Tmem68        | transmembrane protein 68                                                                       | -0.35 | 0.37 |
| 1458667_at   | 4930519N13Rik | RIKEN cDNA 4930519N13 gene                                                                     | 0.48  | 0.36 |
| 1450923_at   | Tgfb2         | transforming growth factor, beta 2                                                             | -1.09 | 0.36 |

|              |               |                                                                                   |       |      |
|--------------|---------------|-----------------------------------------------------------------------------------|-------|------|
| 1436737_a_at | Sorbs1        | sorbin and SH3 domain containing 1                                                | 0.46  | 0.35 |
| 1431340_a_at | 2310002J21Rik | RIKEN cDNA 2310002J21 gene                                                        | -0.46 | 0.35 |
| 1422919_at   | Hrasls        | HRAS-like suppressor                                                              | -0.59 | 0.35 |
| 1436178_at   | Leprel1       | leprecan-like 1                                                                   | -0.85 | 0.35 |
| 1431131_s_at | A630007B06Rik | RIKEN cDNA A630007B06 gene                                                        | -0.35 | 0.35 |
| 1415856_at   | Emb           | embigin                                                                           | -0.88 | 0.33 |
| 1444289_at   | Yipf5         | Yip1 domain family, member 5                                                      | -0.73 | 0.32 |
| 1420855_at   | Eln           | elastin                                                                           | -0.89 | 0.32 |
| 1424318_at   | 1110067D22Rik | RIKEN cDNA 1110067D22 gene                                                        | -0.47 | 0.31 |
| 1417629_at   | Prodh         | proline dehydrogenase                                                             | 1.13  | 0.30 |
| 1423790_at   | Dap           | death-associated protein                                                          | -0.52 | 0.30 |
| 1454916_s_at | Arfip1        | ADP-ribosylation factor interacting protein 1                                     | -0.41 | 0.29 |
| 1423841_at   | Bxdc2         | brix domain containing 2                                                          | -0.67 | 0.29 |
| 1451453_at   | Dapk2         | death-associated kinase 2                                                         | -0.62 | 0.29 |
| 1434802_s_at | Ntf3          | neurotrophin 3                                                                    | -0.69 | 0.28 |
| 1457042_at   | AI256396      | EST AI256396                                                                      | -0.85 | 0.28 |
| 1434787_at   | Arf3          | ADP-ribosylation factor 3                                                         | -0.43 | 0.27 |
| 1451469_at   | D530005L17Rik | RIKEN cDNA D530005L17 gene                                                        | -0.49 | 0.27 |
| 1418792_at   | Sh3gl2        | SH3-domain GRB2-like 2                                                            | 0.39  | 0.26 |
| 1453189_at   | Ube2i         | ubiquitin-conjugating enzyme E2I                                                  | 0.47  | 0.26 |
| 1418350_at   | Hbegf         | heparin-binding EGF-like growth factor                                            | -1.32 | 0.26 |
| 1452283_at   | Rassf8        | Ras association (RalGDS/AF-6) domain family 8                                     | -0.71 | 0.25 |
| 1436181_at   | Itgb1bp1      | integrin beta 1 binding protein 1                                                 | -0.77 | 0.25 |
| 1438271_at   | Lpp           | LIM domain containing preferred translocation partner in lipoma                   | -0.64 | 0.25 |
| 1422568_at   | Ndel1         | nuclear distribution gene E-like homolog 1 (A. nidulans)                          | -0.35 | 0.24 |
| 1452968_at   | Cthrc1        | collagen triple helix repeat containing 1                                         | -0.53 | 0.23 |
| 1452145_at   | H6pd          | hexose-6-phosphate dehydrogenase (glucose 1-dehydrogenase)                        | 0.46  | 0.23 |
| 1433761_at   | NA            | NA                                                                                | -0.63 | 0.22 |
| 1450079_at   | Nrk           | Nik related kinase                                                                | -0.85 | 0.22 |
| 1456415_at   | Zfp451        | zinc finger protein 451                                                           | -0.79 | 0.21 |
| 1430259_at   | Tnfrsf11a     | tumor necrosis factor receptor superfamily, member 11a                            | -0.47 | 0.21 |
| 1428644_at   | Mgat5         | mannoside acetylglucosaminyltransferase 5                                         | -0.65 | 0.20 |
| 1455570_x_at | Cnn3          | calponin 3, acidic                                                                | -0.60 | 0.20 |
| 1423825_at   | Gpr177        | G protein-coupled receptor 177                                                    | -0.57 | 0.20 |
| 1456626_a_at | 1110005A23Rik | RIKEN cDNA 1110005A23 gene                                                        | -0.40 | 0.20 |
| 1435160_at   | 1110064P04Rik | RIKEN cDNA 1110064P04 gene                                                        | -0.49 | 0.19 |
| 1434869_at   | Tdrd3         | tudor domain containing 3                                                         | -0.48 | 0.19 |
| 1455862_at   | 9630054F20Rik | RIKEN cDNA 9630054F20 gene                                                        | -0.63 | 0.18 |
| 1437268_at   | Lancl3        | LanC lantibiotic synthetase component C-like 3 (bacterial)                        | -0.88 | 0.18 |
| 1423033_at   | Stt3a         | STT3, subunit of the oligosaccharyltransferase complex, homolog A (S. cerevisiae) | -0.57 | 0.17 |
| 1426584_a_at | Sord          | sorbitol dehydrogenase                                                            | 0.40  | 0.16 |
| 1439837_at   | Tnrc15        | trinucleotide repeat containing 15                                                | -0.58 | 0.15 |

|              |               |                                                                                               |       |      |
|--------------|---------------|-----------------------------------------------------------------------------------------------|-------|------|
| 1429045_at   | Smurf2        | SMAD specific E3 ubiquitin protein ligase 2                                                   | -0.43 | 0.15 |
| 1456763_at   | AA536749      | expressed sequence AA536749                                                                   | -0.46 | 0.15 |
| 1436297_a_at | Grina         | glutamate receptor, ionotropic, N-methyl D-aspartate-associated protein 1 (glutamate binding) | 0.60  | 0.13 |
| 1452770_at   | Vkorc1        | vitamin K epoxide reductase complex, subunit 1                                                | -0.44 | 0.13 |
| 1423915_at   | Olfml2b       | olfactomedin-like 2B                                                                          | -0.66 | 0.13 |
| 1421818_at   | Bcl6          | B-cell leukemia/lymphoma 6                                                                    | -0.83 | 0.12 |
| 1429027_at   | 0610007N19Rik | RIKEN cDNA 0610007N19 gene                                                                    | -0.60 | 0.12 |
| 1434958_at   | Sacs          | sacsin                                                                                        | -0.83 | 0.12 |
| 1428097_at   | 2510009E07Rik | RIKEN cDNA 2510009E07 gene                                                                    | -0.55 | 0.11 |
| 1434078_at   | D7Wsu128e     | DNA segment, Chr 7, Wayne State University 128, expressed                                     | -0.40 | 0.11 |
| 1423136_at   | Fgf1          | fibroblast growth factor 1                                                                    | -0.49 | 0.10 |
| 1422644_at   | Sh3bgr        | SH3-binding domain glutamic acid-rich protein                                                 | -0.78 | 0.10 |
| 1443550_at   | NA            | NA                                                                                            | -0.33 | 0.08 |
| 1417965_at   | Plekha1       | pleckstrin homology domain containing, family A (phosphoinositide binding specific) member 1  | -0.63 | 0.07 |
| 1449324_at   | Ero1l         | ERO1-like ( <i>S. cerevisiae</i> )                                                            | -0.48 | 0.07 |
| 1431381_at   | 3110005L24Rik | RIKEN cDNA 3110005L24 gene                                                                    | 0.71  | 0.07 |
| 1437396_at   | Creb3l2       | cAMP responsive element binding protein 3-like 2                                              | -0.61 | 0.06 |
| 1421260_a_at | Srm           | spermidine synthase                                                                           | -0.35 | 0.05 |
| 1436204_at   | 1110059G02Rik | RIKEN cDNA 1110059G02 gene                                                                    | -0.73 | 0.04 |
| 1454043_a_at | Kcnab1        | potassium voltage-gated channel, shaker-related subfamily, beta member 1                      | -1.44 | 0.04 |
| 1455779_at   | Hisppd2a      | histidine acid phosphatase domain containing 2A                                               | -0.62 | 0.04 |
| 1444246_at   | Chd2          | chromodomain helicase DNA binding protein 2                                                   | 0.44  | 0.03 |
| 1425066_a_at | 1110061O04Rik | RIKEN cDNA 1110061O04 gene                                                                    | 0.64  | 0.03 |
| 1440484_at   | Unc5d         | unc-5 homolog D ( <i>C. elegans</i> )                                                         | -0.50 | 0.03 |
| 1416749_at   | Htra1         | HtrA serine peptidase 1                                                                       | -0.63 | 0.03 |
| 1416469_at   | Luzp1         | leucine zipper protein 1                                                                      | -0.40 | 0.02 |
| 1433877_at   | 4732473B16Rik | RIKEN cDNA 4732473B16 gene                                                                    | -0.78 | 0.01 |
| 1438993_a_at | Atp6v1d       | ATPase, H <sup>+</sup> transporting, lysosomal V1 subunit D                                   | 0.42  | 0.01 |

**Online Table VI.** Statistically Significant KEGG Pathways Associated with Differentially-Expressed Genes for Diabetic ApoE null Relative to Non-Diabetic ApoE null mice

| Rank | Pathway Name                        | Number of<br>differentially expressed<br>genes in KEGG pathway | Total number of<br>genes in KEGG pathway<br>on chip | False discovery rate<br>corrected gamma p-value |
|------|-------------------------------------|----------------------------------------------------------------|-----------------------------------------------------|-------------------------------------------------|
| 1    | Insulin signaling pathway           | 5                                                              | 137                                                 | 1.5E-03                                         |
| 2    | Bladder cancer                      | 3                                                              | 42                                                  | 9.6E-03                                         |
| 3    | Cell Communication                  | 4                                                              | 130                                                 | 0.01                                            |
| 4    | ECM-receptor interaction            | 3                                                              | 84                                                  | 0.01                                            |
| 5    | Focal adhesion                      | 4                                                              | 192                                                 | 0.01                                            |
| 6    | TGF-beta signaling pathway          | 2                                                              | 89                                                  | 0.01                                            |
| 7    | Antigen processing and presentation | 1                                                              | 99                                                  | 0.01                                            |
| 8    | Adipocytokine signaling pathway     | 1                                                              | 71                                                  | 0.02                                            |
| 9    | Long-term depression                | 2                                                              | 76                                                  | 0.02                                            |

**Online Table VII.** Statistically Significant KEGG Pathways Associated with Differentially Expressed Genes for Diabetic ApoE null/RAGE null Relative to Diabetic ApoE null mice

| Rank | Pathway Name                          | Number of differentially expressed genes in KEGG pathway | Number of genes in KEGG pathway on chip | False discovery rate corrected gamma p-value |
|------|---------------------------------------|----------------------------------------------------------|-----------------------------------------|----------------------------------------------|
| 1    | Phosphatidylinositol signaling system | 3                                                        | 70                                      | 9.7E-12                                      |
| 2    | Wnt signaling pathway                 | 3                                                        | 141                                     | 0.02                                         |
| 3    | Focal adhesion                        | 6                                                        | 186                                     | 0.02                                         |
| 4    | MAPK signaling pathway                | 5                                                        | 249                                     | 0.02                                         |
| 5    | Melanoma                              | 2                                                        | 70                                      | 0.02                                         |
| 6    | Gap junction                          | 2                                                        | 84                                      | 0.02                                         |
| 7    | ErbB signaling pathway                | 2                                                        | 85                                      | 0.02                                         |
| 8    | TGF-beta signaling pathway            | 5                                                        | 86                                      | 0.02                                         |



**Online Table VIII.** Fold Changes of Differentially Expressed Tgf- $\beta$  Pathway Genes in Diabetic ApoE null Relative to Non-Diabetic ApoE null mice

| Gene Symbol | Gene Name                                                                       | log <sub>2</sub><br>FC |
|-------------|---------------------------------------------------------------------------------|------------------------|
| Ppp2r1b     | protein phosphatase 2 (formerly 2A), regulatory subunit A (PR 65), beta isoform | -0.53                  |
| Thbs1       | thrombospondin 1                                                                | 1.32                   |

**Online Table IX.** Fold Changes of Differentially Expressed Tgf- $\beta$  Pathway Genes in Diabetic ApoE null/RAGE null Relative to Diabetic ApoE null mice

| Gene Symbol | Gene Name                                                | $\log_2$<br>FC |
|-------------|----------------------------------------------------------|----------------|
| Ltbp1       | latent transforming growth factor beta binding protein 1 | -1.3           |
| Rock1       | Rho-associated coiled-coil containing protein kinase 1   | -0.66          |
| Smurf2      | SMAD specific E3 ubiquitin protein ligase 2              | -0.43          |
| Tgfb2       | transforming growth factor, beta 2                       | -1.1           |
| Thbs1       | thrombospondin 1                                         | -1.2           |

**Online Table X.** Perturbation Factors of Differentially Expressed Tgf- $\beta$  Pathway Genes in Diabetic ApoE null Relative to Non-Diabetic ApoE null mice

| Gene Symbol | Gene Name                                                                        | Perturbation Factor | log <sub>2</sub> FC | Is Input Gene |
|-------------|----------------------------------------------------------------------------------|---------------------|---------------------|---------------|
| Ltbp1       | latent transforming growth factor beta binding protein 1                         | -1.32               | 0                   | No            |
| Ppp2ca      | protein phosphatase 2 (formerly 2A), catalytic subunit, alpha                    | 0.12                | 0                   | No            |
| Ppp2cb      | protein phosphatase 2 (formerly 2A), catalytic subunit, beta isoform             | 0.12                | 0                   | No            |
| Ppp2r1a     | protein phosphatase 2 (formerly 2A), regulatory subunit A (PR 65), alpha isoform | 0.12                | 0                   | No            |
| Ppp2r1b     | protein phosphatase 2 (formerly 2A), regulatory subunit A (PR 65), beta isoform  | -0.41               | -0.53               | Yes           |
| Ppp2r2b     | protein phosphatase 2 (formerly 2A), regulatory subunit B (PR 52), beta isoform  | 0.12                | 0                   | No            |
| Ppp2r2c     | protein phosphatase 2 (formerly 2A), regulatory subunit B (PR 52), gamma isoform | 0.12                | 0                   | No            |
| Ppp2r2d     | protein phosphatase 2, regulatory subunit B, delta isoform                       | 0.12                | 0                   | No            |
| Rhoa        | ras homolog gene family, member A                                                | 0.12                | 0                   | No            |
| Rock1       | Rho-associated coiled-coil containing protein kinase 1                           | 0.12                | 0                   | No            |
| Rock2       | Rho-associated coiled-coil containing protein kinase 2                           | 0.12                | 0                   | No            |
| Rps6kb1     | ribosomal protein S6 kinase, polypeptide 1                                       | 0.16                | 0                   | No            |
| Rps6kb2     | ribosomal protein S6 kinase, polypeptide 2                                       | 0.16                | 0                   | No            |
| Smad2       | MAD homolog 2 (Drosophila)                                                       | 0.12                | 0                   | No            |
| Smad3       | MAD homolog 3 (Drosophila)                                                       | 0.12                | 0                   | No            |
| Smad4       | MAD homolog 4 (Drosophila)                                                       | 0.24                | 0                   | No            |
| Tgfb1       | transforming growth factor, beta 1                                               | 0.44                | 0                   | No            |
| Tgfb2       | transforming growth factor, beta 2                                               | 0.44                | 0                   | No            |
| Tgfb3       | transforming growth factor, beta 3                                               | 0.44                | 0                   | No            |
| Tgfbr1      | transforming growth factor, beta receptor I                                      | 0.66                | 0                   | No            |
| Tgfbr2      | transforming growth factor, beta receptor II                                     | 0.66                | 0                   | No            |
| Thbs1       | thrombospondin 1                                                                 | 1.32                | 1.32                | Yes           |

**Online Table XI.** Perturbation Factors of Differentially Expressed Tgf- $\beta$  Pathway Genes in Diabetic ApoE null/RAGE null Relative to Diabetic ApoE null mice

| Gene Symbol | Gene Name                                                                        | Perturbation Factor | Fold change | Is Input Gene |
|-------------|----------------------------------------------------------------------------------|---------------------|-------------|---------------|
| Ltbp1       | latent transforming growth factor beta binding protein 1                         | -0.14               | -1.31       | Yes           |
| Ppp2ca      | protein phosphatase 2 (formerly 2A), catalytic subunit, alpha                    | -0.05               | 0.00        | No            |
| Ppp2cb      | protein phosphatase 2 (formerly 2A), catalytic subunit, beta isoform             | -0.05               | 0.00        | No            |
| Ppp2r1a     | protein phosphatase 2 (formerly 2A), regulatory subunit A (PR 65), alpha isoform | -0.05               | 0.00        | No            |
| Ppp2r1b     | protein phosphatase 2 (formerly 2A), regulatory subunit A (PR 65), beta isoform  | -0.05               | 0.00        | No            |
| Ppp2r2b     | protein phosphatase 2 (formerly 2A), regulatory subunit B (PR 52), beta isoform  | -0.05               | 0.00        | No            |
| Ppp2r2c     | protein phosphatase 2 (formerly 2A), regulatory subunit B (PR 52), gamma isoform | -0.05               | 0.00        | No            |
| Ppp2r2d     | protein phosphatase 2, regulatory subunit B, delta isoform                       | -0.05               | 0.00        | No            |
| Rhoa        | ras homolog gene family, member A                                                | -0.05               | 0.00        | No            |
| Rock1       | Rho-associated coiled-coil containing protein kinase 1                           | -0.71               | -0.66       | Yes           |
| Rock2       | Rho-associated coiled-coil containing protein kinase 2                           | -0.05               | 0.00        | No            |
| Rps6kb1     | ribosomal protein S6 kinase, polypeptide 1                                       | -0.17               | 0.00        | No            |
| Rps6kb2     | ribosomal protein S6 kinase, polypeptide 2                                       | -0.17               | 0.00        | No            |
| Smad2       | MAD homolog 2 (Drosophila)                                                       | -0.05               | 0.00        | No            |
| Smad3       | MAD homolog 3 (Drosophila)                                                       | -0.05               | 0.00        | No            |
| Smad4       | MAD homolog 4 (Drosophila)                                                       | -0.10               | 0.00        | No            |
| Smurf2      | SMAD specific E3 ubiquitin protein ligase 2                                      | -0.43               | -0.43       | Yes           |
| Tgfb1       | transforming growth factor, beta 1                                               | 0.05                | 0.00        | No            |
| Tgfb2       | transforming growth factor, beta 2                                               | -1.07               | -1.12       | Yes           |
| Tgfb3       | transforming growth factor, beta 3                                               | 0.05                | 0.00        | No            |
| Tgfbr1      | transforming growth factor, beta receptor I                                      | -0.27               | 0.00        | No            |
| Tgfbr2      | transforming growth factor, beta receptor II                                     | -0.27               | 0.00        | No            |
| Thbs1       | thrombospondin 1                                                                 | -1.17               | -1.17       | Yes           |

**Online Table XII.**

Numbers of Differentially Expressed Genes with Unique Entrez Gene Symbols  
for Diabetic ApoE null mice vs. Non-Diabetic ApoE null mice  
and for Diabetic ApoE null / RAGE null vs. Diabetic ApoE null mice,  
and their Directional and Boolean Subsets

| Online Table                                                                                                                           | Gene set or subset                                                                                                                                |     |
|----------------------------------------------------------------------------------------------------------------------------------------|---------------------------------------------------------------------------------------------------------------------------------------------------|-----|
| XIII                                                                                                                                   | Diabetic ApoE null mice vs. Non-Diabetic ApoE null mice All                                                                                       | 53  |
|                                                                                                                                        | Diabetic ApoE null/RAGE null vs. Diabetic ApoE null mice All                                                                                      | 216 |
|                                                                                                                                        | Diabetic ApoE null mice vs. Non-Diabetic ApoE null mice All UNION Diabetic ApoE null/RAGE null vs. Diabetic ApoE null mice All                    | 254 |
|                                                                                                                                        | Diabetic ApoE null mice vs. Non-Diabetic ApoE null mice All INTERSECTION Diabetic ApoE null / RAGE null vs. Diabetic ApoE null mice All           | 15  |
|                                                                                                                                        | Diabetic ApoE null mice vs. Non-Diabetic ApoE null mice All NOT Diabetic ApoE null / RAGE null vs. Diabetic ApoE null mice All                    | 38  |
|                                                                                                                                        | Diabetic ApoE null/RAGE null vs. diabetic ApoE null mice All NOT Diabetic ApoE null mice vs. Non-Diabetic ApoE null mice All                      | 201 |
| XIV                                                                                                                                    | Diabetic ApoE null mice vs. Non-Diabetic ApoE null mice Positive                                                                                  | 34  |
|                                                                                                                                        | Diabetic ApoE null/RAGE null vs. Diabetic ApoE null mice Positive                                                                                 | 27  |
|                                                                                                                                        | Diabetic ApoE null mice vs. non-diabetic ApoE null mice Positive UNION Diabetic ApoE null / RAGE null vs. Diabetic ApoE null mice Positive        | 61  |
|                                                                                                                                        | Diabetic ApoE null mice vs. non-diabetic ApoE null mice Positive INTERSECTION Diabetic ApoE null / RAGE null vs. Diabetic ApoE null mice Positive | 0   |
|                                                                                                                                        | Diabetic ApoE null mice vs. non-diabetic ApoE null mice Positive NOT Diabetic ApoE null / RAGE null vs. Diabetic ApoE null mice Positive          | 34  |
| Diabetic ApoE null/RAGE null vs. diabetic ApoE null mice Positive NOT Diabetic ApoE null mice vs. Non-Diabetic ApoE null mice Positive | 27                                                                                                                                                |     |
| XV                                                                                                                                     | Diabetic ApoE null mice vs. Non-Diabetic ApoE null mice Negative                                                                                  | 19  |
|                                                                                                                                        | Diabetic ApoE null/RAGE null vs. Diabetic ApoE null mice Negative                                                                                 | 189 |
|                                                                                                                                        | Diabetic ApoE null mice vs. Non-Diabetic ApoE null mice Negative UNION Diabetic ApoE null / RAGE null vs. Diabetic ApoE null mice Positive        | 208 |
|                                                                                                                                        | Diabetic ApoE null mice vs. Non-Diabetic ApoE null mice Negative INTERSECTION Diabetic ApoE null / RAGE null vs. Diabetic ApoE null mice Positive | 0   |
|                                                                                                                                        | Diabetic ApoE null mice vs. Non-Diabetic ApoE null mice Negative NOT Diabetic ApoE null / RAGE null vs. Diabetic ApoE null mice Positive          | 19  |
| Diabetic ApoE null/RAGE null vs. diabetic ApoE null mice Positive NOT Diabetic ApoE null mice vs. Non-Diabetic ApoE null mice Negative | 189                                                                                                                                               |     |
| XVI                                                                                                                                    | Diabetic ApoE null mice vs. Non-Diabetic ApoE null mice Positive                                                                                  | 34  |
|                                                                                                                                        | Diabetic ApoE null/RAGE null vs. Diabetic ApoE null mice Negative                                                                                 | 189 |
|                                                                                                                                        | Diabetic ApoE null mice vs. Non-Diabetic ApoE null mice Positive UNION Diabetic ApoE null / RAGE null vs. Diabetic ApoE null mice Positive        | 210 |
|                                                                                                                                        | Diabetic ApoE null mice vs. Non-Diabetic ApoE null mice Positive INTERSECTION Diabetic ApoE null / RAGE null vs. Diabetic ApoE null mice Positive | 14  |
|                                                                                                                                        | Diabetic ApoE null mice vs. Non-Diabetic ApoE null mice Positive NOT Diabetic ApoE null / RAGE null vs. Diabetic ApoE null mice Positive          | 21  |
| Diabetic ApoE null/RAGE null vs. Diabetic ApoE null mice Positive NOT Diabetic ApoE null mice vs. Non-Diabetic ApoE null mice Positive | 175                                                                                                                                               |     |

|      |                                                                                                                                                   |    |
|------|---------------------------------------------------------------------------------------------------------------------------------------------------|----|
| XVII | Diabetic ApoE null mice vs. Non-Diabetic ApoE null mice Negative                                                                                  | 19 |
|      | Diabetic ApoE null/RAGE null vs. Diabetic ApoE null mice Positive                                                                                 | 27 |
|      | Diabetic ApoE null mice vs. non-diabetic ApoE null mice Negative UNION Diabetic ApoE null / RAGE null vs. Diabetic ApoE null mice Positive        | 45 |
|      | Diabetic ApoE null mice vs. Non-Diabetic ApoE null mice Negative INTERSECTION Diabetic ApoE null / RAGE null vs. Diabetic ApoE null mice Positive | 1  |
|      | Diabetic ApoE null mice vs. Non-Diabetic ApoE null mice Negative NOT Diabetic ApoE null / RAGE null vs. Diabetic ApoE null mice Positive          | 18 |
|      | Diabetic ApoE null/RAGE null vs. Diabetic ApoE null mice Positive NOT Diabetic ApoE null mice vs. Non-Diabetic ApoE null mice Negative            | 26 |

**Online Table XIII.**

Differentially Expressed Genes with Unique Entrez Gene Symbols  
for Diabetic ApoE null mice vs. Non-Diabetic ApoE null mice  
and for Diabetic ApoE null / RAGE null vs. Diabetic ApoE null mice,  
and their Boolean Subsets

| Diabetic ApoE null mice vs. Non-Diabetic ApoE null mice All | Diabetic ApoE null / RAGE null vs. Diabetic ApoE null mice All | Diabetic ApoE null mice vs. Non-Diabetic ApoE null mice All UNION Diabetic ApoE null / RAGE null vs. Diabetic ApoE null mice All | Diabetic ApoE null mice vs. Non-Diabetic ApoE null mice All INTERSECTION Diabetic ApoE null / RAGE null vs. Diabetic ApoE null mice All | Diabetic ApoE null mice vs. Non-Diabetic ApoE null mice All NOT Diabetic ApoE null / RAGE null vs. Diabetic ApoE null mice All | Diabetic ApoE null / RAGE null vs. Diabetic ApoE null mice All NOT Diabetic ApoE null mice All |
|-------------------------------------------------------------|----------------------------------------------------------------|----------------------------------------------------------------------------------------------------------------------------------|-----------------------------------------------------------------------------------------------------------------------------------------|--------------------------------------------------------------------------------------------------------------------------------|------------------------------------------------------------------------------------------------|
| Aacs                                                        | Acbd3                                                          | Aacs                                                                                                                             | Chordc1                                                                                                                                 | Aacs                                                                                                                           | Acbd3                                                                                          |
| Acaca                                                       | Acot1                                                          | Acaca                                                                                                                            | Crem                                                                                                                                    | Acaca                                                                                                                          | Acot1                                                                                          |
| Acacb                                                       | Anapc1                                                         | Acacb                                                                                                                            | Cyp26b1                                                                                                                                 | Acacb                                                                                                                          | Anapc1                                                                                         |
| Acly                                                        | Anln                                                           | Acbd3                                                                                                                            | Dnaja1                                                                                                                                  | Acly                                                                                                                           | Anln                                                                                           |
| Acss2                                                       | Arf3                                                           | Acly                                                                                                                             | Erdr1                                                                                                                                   | Acss2                                                                                                                          | Arf3                                                                                           |
| Agbl3                                                       | Arfip1                                                         | Acot1                                                                                                                            | Golt1b                                                                                                                                  | Agbl3                                                                                                                          | Arfip1                                                                                         |
| Anxa3                                                       | Armc8                                                          | Acss2                                                                                                                            | Hsp110                                                                                                                                  | Anxa3                                                                                                                          | Armc8                                                                                          |
| Chordc1                                                     | Armcx3                                                         | Agbl3                                                                                                                            | Hspa1b                                                                                                                                  | Ctps                                                                                                                           | Armcx3                                                                                         |
| Crem                                                        | Atp6v1d                                                        | Anapc1                                                                                                                           | Rybp                                                                                                                                    | Eef1e1                                                                                                                         | Atp6v1d                                                                                        |
| Ctps                                                        | B3galnt2                                                       | Anln                                                                                                                             | S100a4                                                                                                                                  | Emp1                                                                                                                           | B3galnt2                                                                                       |
| Cyp26b1                                                     | Bcas3                                                          | Anxa3                                                                                                                            | Slc7a1                                                                                                                                  | Fasn                                                                                                                           | Bcas3                                                                                          |
| Dnaja1                                                      | Bcl6                                                           | Arf3                                                                                                                             | Thbs1                                                                                                                                   | Figf                                                                                                                           | Bcl6                                                                                           |
| Eef1e1                                                      | Bdh1                                                           | Arfip1                                                                                                                           | Tparl                                                                                                                                   | Fmo5                                                                                                                           | Bdh1                                                                                           |
| Emp1                                                        | Bnip2                                                          | Armc8                                                                                                                            | Tshz3                                                                                                                                   | Fn1                                                                                                                            | Bnip2                                                                                          |
| Erdr1                                                       | Btaf1                                                          | Armcx3                                                                                                                           | Tspan6                                                                                                                                  | H2-Q10                                                                                                                         | Btaf1                                                                                          |
| Fasn                                                        | Bxdc2                                                          | Atp6v1d                                                                                                                          |                                                                                                                                         | Hexim1                                                                                                                         | Bxdc2                                                                                          |
| Figf                                                        | Bysl                                                           | B3galnt2                                                                                                                         |                                                                                                                                         | Ifitm2                                                                                                                         | Bysl                                                                                           |
| Fmo5                                                        | C1galt1                                                        | Bcas3                                                                                                                            |                                                                                                                                         | Kpna2                                                                                                                          | C1galt1                                                                                        |
| Fn1                                                         | C1qtnf2                                                        | Bcl6                                                                                                                             |                                                                                                                                         | Kras                                                                                                                           | C1qtnf2                                                                                        |
| Golt1b                                                      | Cacna2d1                                                       | Bdh1                                                                                                                             |                                                                                                                                         | Lmn2                                                                                                                           | Cacna2d1                                                                                       |
| H2-Q10                                                      | Cav3                                                           | Bnip2                                                                                                                            |                                                                                                                                         | Mod1                                                                                                                           | Cav3                                                                                           |
| Hexim1                                                      | Cbx5                                                           | Btaf1                                                                                                                            |                                                                                                                                         | Mt11                                                                                                                           | Cbx5                                                                                           |
| Hsp110                                                      | Ccrn4l                                                         | Bxdc2                                                                                                                            |                                                                                                                                         | Mt4                                                                                                                            | Ccrn4l                                                                                         |
| Hspa1b                                                      | Cdr2                                                           | Bysl                                                                                                                             |                                                                                                                                         | Nudt18                                                                                                                         | Cdr2                                                                                           |
| Ifitm2                                                      | Chd1                                                           | C1galt1                                                                                                                          |                                                                                                                                         | Ppp2r1b                                                                                                                        | Chd1                                                                                           |
| Kpna2                                                       | Chd2                                                           | C1qtnf2                                                                                                                          |                                                                                                                                         | Pvt1                                                                                                                           | Chd2                                                                                           |
| Kras                                                        | Chordc1                                                        | Cacna2d1                                                                                                                         |                                                                                                                                         | Pygl                                                                                                                           | Chrna1                                                                                         |
| Lmn2                                                        | Chrna1                                                         | Cav3                                                                                                                             |                                                                                                                                         | Rbm8a                                                                                                                          | Chsy1                                                                                          |
| Mod1                                                        | Chsy1                                                          | Cbx5                                                                                                                             |                                                                                                                                         | Reln                                                                                                                           | Ckap4                                                                                          |
| Mt11                                                        | Ckap4                                                          | Ccrn4l                                                                                                                           |                                                                                                                                         | Sfpq                                                                                                                           | Cnn3                                                                                           |
| Mt4                                                         | Cnn3                                                           | Cdr2                                                                                                                             |                                                                                                                                         | Sfrs3                                                                                                                          | Col5a2                                                                                         |
| Nudt18                                                      | Col5a2                                                         | Chd1                                                                                                                             |                                                                                                                                         | Slc1a5                                                                                                                         | Copz2                                                                                          |
| Ppp2r1b                                                     | Copz2                                                          | Chd2                                                                                                                             |                                                                                                                                         | Slc25a1                                                                                                                        | Creb3l2                                                                                        |
| Pvt1                                                        | Creb3l2                                                        | Chordc1                                                                                                                          |                                                                                                                                         | Thrsp                                                                                                                          | Crispld1                                                                                       |

|         |          |          |        |          |
|---------|----------|----------|--------|----------|
| Pygl    | Crem     | Chrna1   | Tkt    | Cthrc1   |
| Rbm8a   | Crispld1 | Chsy1    | Tm4sf1 | Dap      |
| Reln    | Cthrc1   | Ckap4    | Ube1l2 | Dapk2    |
| Rybp    | Cyp26b1  | Cnn3     | Wwc2   | Dgkg     |
| S100a4  | Dap      | Col5a2   |        | Dock7    |
| Sfpq    | Dapk2    | Copz2    |        | Dscr1l1  |
| Sfrs3   | Dgkg     | Creb3l2  |        | Dusp12   |
| Slc1a5  | Dnaja1   | Crem     |        | Dynll1   |
| Slc25a1 | Dock7    | Crispld1 |        | Efhc2    |
| Slc7a1  | Dscr1l1  | Cthrc1   |        | Eln      |
| Thbs1   | Dusp12   | Ctps     |        | Emb      |
| Thrsp   | Dynll1   | Cyp26b1  |        | Eml5     |
| Tkt     | Efhc2    | Dap      |        | Emp2     |
| Tm4sf1  | Eln      | Dapk2    |        | Emp3     |
| Tparl   | Emb      | Dgkg     |        | Enah     |
| Tshz3   | Eml5     | Dnaja1   |        | Endod1   |
| Tspan6  | Emp2     | Dock7    |        | Ereg     |
| Ube1l2  | Emp3     | Dscr1l1  |        | Ero1l    |
| Wwc2    | Enah     | Dusp12   |        | Ext1     |
|         | Endod1   | Dynll1   |        | Fgf1     |
|         | Erdr1    | Eef1e1   |        | Fjx1     |
|         | Ereg     | Efhc2    |        | Fkbp14   |
|         | Ero1l    | Eln      |        | Fryl     |
|         | Ext1     | Emb      |        | Gal3st4  |
|         | Fgf1     | Eml5     |        | Ggh      |
|         | Fjx1     | Emp1     |        | Glo1     |
|         | Fkbp14   | Emp2     |        | Glp1r    |
|         | Fryl     | Emp3     |        | Gm347    |
|         | Gal3st4  | Enah     |        | Gm70     |
|         | Ggh      | Endod1   |        | Gmds     |
|         | Glo1     | Erdr1    |        | Gne      |
|         | Glp1r    | Ereg     |        | Gpatc2   |
|         | Gm347    | Ero1l    |        | Gpr125   |
|         | Gm70     | Ext1     |        | Gpr177   |
|         | Gmds     | Fasn     |        | Grina    |
|         | Gne      | Fgf1     |        | H6pd     |
|         | Golt1b   | Figf     |        | Hbegf    |
|         | Gpatc2   | Fjx1     |        | Hcfc2    |
|         | Gpr125   | Fkbp14   |        | Hdac9    |
|         | Gpr177   | Fmo5     |        | Hdlbp    |
|         | Grina    | Fn1      |        | Hisppd2a |
|         | H6pd     | Fryl     |        | Hrasls   |
|         | Hbegf    | Gal3st4  |        | Hrb      |
|         | Hcfc2    | Ggh      |        | Hspa1a   |
|         | Hdac9    | Glo1     |        | Hspb2    |



|          |          |          |
|----------|----------|----------|
| Hdlbp    | Glp1r    | Htra1    |
| Hisppd2a | Gm347    | Il17b    |
| Hrasls   | Gm70     | Itga9    |
| Hrb      | Gmds     | Itgb1bp1 |
| Hsp110   | Gne      | Itpr1    |
| Hspa1a   | Golt1b   | Kcnab1   |
| Hspa1b   | Gpatc2   | Kdelr2   |
| Hspb2    | Gpr125   | Kdelr3   |
| Htra1    | Gpr177   | Kpna1    |
| Il17b    | Grina    | Ky       |
| Itga9    | H2-Q10   | Lancl3   |
| Itgb1bp1 | H6pd     | Lasp1    |
| Itpr1    | Hbegf    | Lats2    |
| Kcnab1   | Hcfc2    | Lbh      |
| Kdelr2   | Hdac9    | Leprel1  |
| Kdelr3   | Hdlbp    | Lox      |
| Kpna1    | Hexim1   | Lpp      |
| Ky       | Hisppd2a | Lrrc61   |
| Lancl3   | Hrasls   | Lrrfip1  |
| Lasp1    | Hrb      | Ltbp1    |
| Lats2    | Hsp110   | Luzp1    |
| Lbh      | Hspa1a   | Maged2   |
| Leprel1  | Hspa1b   | Mapk6    |
| Lox      | Hspb2    | Mfap5    |
| Lpp      | Htra1    | Mgat5    |
| Lrrc61   | Ifitm2   | Mobk1b   |
| Lrrfip1  | Il17b    | Mrpl15   |
| Ltbp1    | Itga9    | Mtdh     |
| Luzp1    | Itgb1bp1 | Myh10    |
| Maged2   | Itpr1    | Ndel1    |
| Mapk6    | Kcnab1   | Nedd9    |
| Mfap5    | Kdelr2   | Ngp      |
| Mgat5    | Kdelr3   | Nhlrc2   |
| Mobk1b   | Kpna1    | Nrk      |
| Mrpl15   | Kpna2    | Ntf3     |
| Mtdh     | Kras     | Olfml2b  |
| Myh10    | Ky       | P4ha1    |
| Ndel1    | Lancl3   | Pank2    |
| Nedd9    | Lasp1    | Pbef1    |
| Ngp      | Lats2    | Pcgf5    |
| Nhlrc2   | Lbh      | Pdgd     |
| Nrk      | Leprel1  | Pdgfrl   |
| Ntf3     | Lmnb2    | Pdlim1   |
| Olfml2b  | Lox      | Pdlim5   |
| P4ha1    | Lpp      | Pgcp     |

|          |         |          |
|----------|---------|----------|
| Pank2    | Lrrc61  | Phtf2    |
| Pbef1    | Lrrfip1 | Pigm     |
| Pcgf5    | Ltbp1   | Pip5k1a  |
| Pdgsf    | Luzp1   | Plaur    |
| Pdgfrl   | Maged2  | Plekha1  |
| Pdlim1   | Mapk6   | Plod2    |
| Pdlim5   | Mfap5   | Pols     |
| Pgcp     | Mgat5   | Prlr     |
| Phtf2    | Mobk1b  | Prodh    |
| Pigm     | Mod1    | Psip1    |
| Pip5k1a  | Mrpl15  | Ptprz1   |
| Plaur    | Mtdh    | Pycr1    |
| Plekha1  | Mtmr11  | Rab23    |
| Plod2    | Mtmr4   | Rab31    |
| Pols     | Myh10   | Rabep1   |
| Prlr     | Ndel1   | Ramp1    |
| Prodh    | Nedd9   | Rarres2  |
| Psip1    | Ngp     | Rassf8   |
| Ptprz1   | Nhlrc2  | Rbbp9    |
| Pycr1    | Nrk     | Reck     |
| Rab23    | Ntf3    | Rnd1     |
| Rab31    | Nudt18  | Rock1    |
| Rabep1   | Olfml2b | Sacs     |
| Ramp1    | P4ha1   | Scx      |
| Rarres2  | Pank2   | Sec22l1  |
| Rassf8   | Pbef1   | Sec23a   |
| Rbbp9    | Pcgf5   | Sec24a   |
| Reck     | Pdgsf   | Sema3c   |
| Rnd1     | Pdgfrl  | Serpine1 |
| Rock1    | Pdlim1  | Sfrp2    |
| Rybp     | Pdlim5  | Sgcb     |
| S100a4   | Pgcp    | Sgce     |
| Sacs     | Phtf2   | Sgcg     |
| Scx      | Pigm    | Sgol2    |
| Sec22l1  | Pip5k1a | Sh3bgr   |
| Sec23a   | Plaur   | Sh3gl2   |
| Sec24a   | Plekha1 | Six5     |
| Sema3c   | Plod2   | Slc9a2   |
| Serpine1 | Pols    | Smurf2   |
| Sfrp2    | Ppp2r1b | Sorbs1   |
| Sgcb     | Prlr    | Sord     |
| Sgce     | Prodh   | Srm      |
| Sgcg     | Psip1   | Srprb    |
| Sgol2    | Ptprz1  | St8sia6  |
| Sh3bgr   | Pvt1    | Stch     |

|           |          |           |
|-----------|----------|-----------|
| Sh3gl2    | Pycr1    | Stk25     |
| Six5      | Pygl     | Stk38l    |
| Slc7a1    | Rab23    | Stt3a     |
| Slc9a2    | Rab31    | Sulf1     |
| Smurf2    | Rabep1   | Surb7     |
| Sorbs1    | Ramp1    | Sync      |
| Sord      | Rarres2  | Tdrd3     |
| Srm       | Rassf8   | Tgfb2     |
| Srprb     | Rbbp9    | Timp4     |
| St8sia6   | Rbm8a    | Tmem39a   |
| Stch      | Reck     | Tmem45a   |
| Stk25     | Reln     | Tmem68    |
| Stk38l    | Rnd1     | Tmtc3     |
| Stt3a     | Rock1    | Tnfaip1   |
| Sulf1     | Rybp     | Tnfrsf11a |
| Surb7     | S100a4   | Tnfrsf12a |
| Sync      | Sacs     | Tnrc15    |
| Tdrd3     | Scx      | Trp53inp2 |
| Tgfb2     | Sec22l1  | Tspan2    |
| Thbs1     | Sec23a   | Ube2i     |
| Timp4     | Sec24a   | Unc5d     |
| Tmem39a   | Sema3c   | Vkorc1    |
| Tmem45a   | Serpine1 | Wif1      |
| Tmem68    | Sfpq     | Wisp2     |
| Tmtc3     | Sfrp2    | Wtip      |
| Tnfaip1   | Sfrs3    | Xdh       |
| Tnfrsf11a | Sgcb     | Yipf5     |
| Tnfrsf12a | Sgce     | Zbtb41    |
| Tnrc15    | Sgcg     | Zcchc10   |
| Tpar1     | Sgol2    | Zfp148    |
| Trp53inp2 | Sh3bgr   | Zfp451    |
| Tshz3     | Sh3gl2   | Zfp9      |
| Tspan2    | Six5     |           |
| Tspan6    | Slc1a5   |           |
| Ube2i     | Slc25a1  |           |
| Unc5d     | Slc7a1   |           |
| Vkorc1    | Slc9a2   |           |
| Wif1      | Smurf2   |           |
| Wisp2     | Sorbs1   |           |
| Wtip      | Sord     |           |
| Xdh       | Srm      |           |
| Yipf5     | Srprb    |           |
| Zbtb41    | St8sia6  |           |
| Zcchc10   | Stch     |           |
| Zfp148    | Stk25    |           |

Zfp451  
Zfp9

Stk38l  
Stt3a  
Sulf1  
Surb7  
Sync  
Tdrd3  
Tgfb2  
Thbs1  
Thrsp  
Timp4  
Tkt  
Tm4sf1  
Tmem39a  
Tmem45a  
Tmem68  
Tmtc3  
Tnfaip1  
Tnfrsf11a  
Tnfrsf12a  
Tnrc15  
Tparl  
Trp53inp2  
Tshz3  
Tspan2  
Tspan6  
Ube1l2  
Ube2i  
Unc5d  
Vkorc1  
Wif1  
Wisp2  
Wtip  
Wwc2  
Xdh  
Yipf5  
Zbtb41  
Zcchc10  
Zfp148  
Zfp451  
Zfp9

**Online Table XIV.**

Differentially Expressed Genes with Unique Entrez Gene Symbols for Diabetic ApoE null mice vs. Non-Diabetic ApoE null mice and for Diabetic ApoE null / RAGE null vs. Diabetic ApoE null mice both with Positive log2 Fold Change and their Boolean Subsets

| Diabetic ApoE null mice vs. Non-Diabetic ApoE null mice Positive | Diabetic ApoE null / RAGE null vs. Diabetic ApoE null mice Positive | Diabetic ApoE null mice vs. Non-Diabetic ApoE null mice Positive UNION Diabetic ApoE null / RAGE null vs. Diabetic ApoE null mice Positive | Diabetic ApoE null mice vs. Non-Diabetic ApoE null mice Positive INTERSECTION Diabetic ApoE null / RAGE null vs. Diabetic ApoE null mice Positive | Diabetic ApoE null mice vs. Non-Diabetic ApoE null mice Positive NOT Diabetic ApoE null / RAGE null vs. Diabetic ApoE null mice Positive | Diabetic ApoE null / RAGE null vs. Diabetic ApoE null mice Positive NOT Diabetic ApoE null mice vs. Non-Diabetic ApoE null mice Positive |
|------------------------------------------------------------------|---------------------------------------------------------------------|--------------------------------------------------------------------------------------------------------------------------------------------|---------------------------------------------------------------------------------------------------------------------------------------------------|------------------------------------------------------------------------------------------------------------------------------------------|------------------------------------------------------------------------------------------------------------------------------------------|
| Anxa3                                                            | Acot1                                                               | Acot1                                                                                                                                      |                                                                                                                                                   | Anxa3                                                                                                                                    | Acot1                                                                                                                                    |
| Chordc1                                                          | Atp6v1d                                                             | Anxa3                                                                                                                                      |                                                                                                                                                   | Chordc1                                                                                                                                  | Atp6v1d                                                                                                                                  |
| Crem                                                             | Bcas3                                                               | Atp6v1d                                                                                                                                    |                                                                                                                                                   | Crem                                                                                                                                     | Bcas3                                                                                                                                    |
| Ctps                                                             | Ccrn4l                                                              | Bcas3                                                                                                                                      |                                                                                                                                                   | Ctps                                                                                                                                     | Ccrn4l                                                                                                                                   |
| Cyp26b1                                                          | Chd1                                                                | Ccrn4l                                                                                                                                     |                                                                                                                                                   | Cyp26b1                                                                                                                                  | Chd1                                                                                                                                     |
| Dnaja1                                                           | Chd2                                                                | Chd1                                                                                                                                       |                                                                                                                                                   | Dnaja1                                                                                                                                   | Chd2                                                                                                                                     |
| Eef1e1                                                           | Eml5                                                                | Chd2                                                                                                                                       |                                                                                                                                                   | Eef1e1                                                                                                                                   | Eml5                                                                                                                                     |
| Emp1                                                             | Erdr1                                                               | Chordc1                                                                                                                                    |                                                                                                                                                   | Emp1                                                                                                                                     | Erdr1                                                                                                                                    |
| Figf                                                             | Glo1                                                                | Crem                                                                                                                                       |                                                                                                                                                   | Figf                                                                                                                                     | Glo1                                                                                                                                     |
| Fn1                                                              | Glp1r                                                               | Ctps                                                                                                                                       |                                                                                                                                                   | Fn1                                                                                                                                      | Glp1r                                                                                                                                    |
| Golt1b                                                           | Gpatc2                                                              | Cyp26b1                                                                                                                                    |                                                                                                                                                   | Golt1b                                                                                                                                   | Gpatc2                                                                                                                                   |
| Hexim1                                                           | Grina                                                               | Dnaja1                                                                                                                                     |                                                                                                                                                   | Hexim1                                                                                                                                   | Grina                                                                                                                                    |
| Hsp110                                                           | H6pd                                                                | Eef1e1                                                                                                                                     |                                                                                                                                                   | Hsp110                                                                                                                                   | H6pd                                                                                                                                     |
| Hspa1b                                                           | Mrpl15                                                              | Eml5                                                                                                                                       |                                                                                                                                                   | Hspa1b                                                                                                                                   | Mrpl15                                                                                                                                   |
| Ifitm2                                                           | Ngp                                                                 | Emp1                                                                                                                                       |                                                                                                                                                   | Ifitm2                                                                                                                                   | Ngp                                                                                                                                      |
| Kpna2                                                            | Pbef1                                                               | Erdr1                                                                                                                                      |                                                                                                                                                   | Kpna2                                                                                                                                    | Pbef1                                                                                                                                    |
| Kras                                                             | Prlr                                                                | Figf                                                                                                                                       |                                                                                                                                                   | Kras                                                                                                                                     | Prlr                                                                                                                                     |
| Lmnb2                                                            | Prodh                                                               | Fn1                                                                                                                                        |                                                                                                                                                   | Lmnb2                                                                                                                                    | Prodh                                                                                                                                    |
| Mtmr4                                                            | Sgol2                                                               | Glo1                                                                                                                                       |                                                                                                                                                   | Mtmr4                                                                                                                                    | Sgol2                                                                                                                                    |
| Pvt1                                                             | Sh3gl2                                                              | Glp1r                                                                                                                                      |                                                                                                                                                   | Pvt1                                                                                                                                     | Sh3gl2                                                                                                                                   |
| Rbm8a                                                            | Sorbs1                                                              | Golt1b                                                                                                                                     |                                                                                                                                                   | Rbm8a                                                                                                                                    | Sorbs1                                                                                                                                   |
| Reln                                                             | Sord                                                                | Gpatc2                                                                                                                                     |                                                                                                                                                   | Reln                                                                                                                                     | Sord                                                                                                                                     |
| Rybp                                                             | St8sia6                                                             | Grina                                                                                                                                      |                                                                                                                                                   | Rybp                                                                                                                                     | St8sia6                                                                                                                                  |
| S100a4                                                           | Timp4                                                               | H6pd                                                                                                                                       |                                                                                                                                                   | S100a4                                                                                                                                   | Timp4                                                                                                                                    |
| Sfpq                                                             | Trp53inp2                                                           | Hexim1                                                                                                                                     |                                                                                                                                                   | Sfpq                                                                                                                                     | Trp53inp2                                                                                                                                |
| Sfrs3                                                            | Ube2i                                                               | Hsp110                                                                                                                                     |                                                                                                                                                   | Sfrs3                                                                                                                                    | Ube2i                                                                                                                                    |
| Slc7a1                                                           | Xdh                                                                 | Hspa1b                                                                                                                                     |                                                                                                                                                   | Slc7a1                                                                                                                                   | Xdh                                                                                                                                      |
| Thbs1                                                            |                                                                     | Ifitm2                                                                                                                                     |                                                                                                                                                   | Thbs1                                                                                                                                    |                                                                                                                                          |

Tm4sf1  
Tparl  
Tshz3  
Tspan6  
Ube1l2  
Wwc2

Kpna2  
Kras  
Lmnb2  
Mrpl15  
Mtmr4  
Ngp  
Pbef1  
Prir  
Prodh  
Pvt1  
Rbm8a  
Reln  
Rybp  
S100a4  
Sfpq  
Sfrs3  
Sgol2  
Sh3gl2  
Slc7a1  
Sorbs1  
Sord  
St8sia6  
Thbs1  
Timp4  
Tm4sf1  
Tparl  
Trp53inp2  
Tshz3  
Tspan6  
Ube1l2  
Ube2i  
Wwc2  
Xdh

Tm4sf1  
Tparl  
Tshz3  
Tspan6  
Ube1l2  
Wwc2

**Online Table XV.**

Differentially Expressed Genes with Unique Entrez Gene Symbols for Diabetic ApoE null mice vs. Non-Diabetic ApoE null mice and for Diabetic ApoE null / RAGE null vs. Diabetic ApoE null mice both with Negative log2 Fold Change and their Boolean Subsets

| Diabetic ApoE null mice vs. Non-Diabetic ApoE null mice Negative | Diabetic ApoE null / RAGE null vs. Diabetic ApoE null mice Negative | Diabetic ApoE null mice vs. Non-Diabetic ApoE null mice Negative UNION Diabetic ApoE null / RAGE null vs. Diabetic ApoE null mice Negative | Diabetic ApoE null mice vs. Non-Diabetic ApoE null mice Negative INTERSECTION Diabetic ApoE null / RAGE null vs. Diabetic ApoE null mice Negative<br>No Entries | Diabetic ApoE null mice vs. Non-Diabetic ApoE null mice Negative NOT Diabetic ApoE null / RAGE null vs. Diabetic ApoE null mice Negative | Diabetic ApoE null / RAGE null vs. Diabetic ApoE null mice Negative NOT Diabetic ApoE null mice vs. Non-Diabetic ApoE null mice Negative |
|------------------------------------------------------------------|---------------------------------------------------------------------|--------------------------------------------------------------------------------------------------------------------------------------------|-----------------------------------------------------------------------------------------------------------------------------------------------------------------|------------------------------------------------------------------------------------------------------------------------------------------|------------------------------------------------------------------------------------------------------------------------------------------|
| Aacs                                                             | Acbd3                                                               | Aacs                                                                                                                                       |                                                                                                                                                                 | Aacs                                                                                                                                     | Acbd3                                                                                                                                    |
| Acaca                                                            | Anapc1                                                              | Acaca                                                                                                                                      |                                                                                                                                                                 | Acaca                                                                                                                                    | Anapc1                                                                                                                                   |
| Acacb                                                            | Anln                                                                | Acacb                                                                                                                                      |                                                                                                                                                                 | Acacb                                                                                                                                    | Anln                                                                                                                                     |
| Acly                                                             | Arf3                                                                | Acly                                                                                                                                       |                                                                                                                                                                 | Acly                                                                                                                                     | Arf3                                                                                                                                     |
| Acss2                                                            | Arfip1                                                              | Acss2                                                                                                                                      |                                                                                                                                                                 | Acss2                                                                                                                                    | Arfip1                                                                                                                                   |
| Agbl3                                                            | Armc8                                                               | Agbl3                                                                                                                                      |                                                                                                                                                                 | Agbl3                                                                                                                                    | Armc8                                                                                                                                    |
| Erdr1                                                            | Armcx3                                                              | Erdr1                                                                                                                                      |                                                                                                                                                                 | Erdr1                                                                                                                                    | Armcx3                                                                                                                                   |
| Fasn                                                             | B3galnt2                                                            | Fasn                                                                                                                                       |                                                                                                                                                                 | Fasn                                                                                                                                     | B3galnt2                                                                                                                                 |
| Fmo5                                                             | Bcl6                                                                | Fmo5                                                                                                                                       |                                                                                                                                                                 | Fmo5                                                                                                                                     | Bcl6                                                                                                                                     |
| H2-Q10                                                           | Bdh1                                                                | H2-Q10                                                                                                                                     |                                                                                                                                                                 | H2-Q10                                                                                                                                   | Bdh1                                                                                                                                     |
| Mod1                                                             | Bnip2                                                               | Mod1                                                                                                                                       |                                                                                                                                                                 | Mod1                                                                                                                                     | Bnip2                                                                                                                                    |
| Mttr11                                                           | Btaf1                                                               | Mttr11                                                                                                                                     |                                                                                                                                                                 | Mttr11                                                                                                                                   | Btaf1                                                                                                                                    |
| Nudt18                                                           | Bxdc2                                                               | Nudt18                                                                                                                                     |                                                                                                                                                                 | Nudt18                                                                                                                                   | Bxdc2                                                                                                                                    |
| Ppp2r1b                                                          | Bysl                                                                | Ppp2r1b                                                                                                                                    |                                                                                                                                                                 | Ppp2r1b                                                                                                                                  | Bysl                                                                                                                                     |
| Pygl                                                             | C1galt1                                                             | Pygl                                                                                                                                       |                                                                                                                                                                 | Pygl                                                                                                                                     | C1galt1                                                                                                                                  |
| Slc1a5                                                           | C1qtnf2                                                             | Slc1a5                                                                                                                                     |                                                                                                                                                                 | Slc1a5                                                                                                                                   | C1qtnf2                                                                                                                                  |
| Slc25a1                                                          | Cacna2d1                                                            | Slc25a1                                                                                                                                    |                                                                                                                                                                 | Slc25a1                                                                                                                                  | Cacna2d1                                                                                                                                 |
| Thrsp                                                            | Cav3                                                                | Thrsp                                                                                                                                      |                                                                                                                                                                 | Thrsp                                                                                                                                    | Cav3                                                                                                                                     |
| Tkt                                                              | Cbx5                                                                | Tkt                                                                                                                                        |                                                                                                                                                                 | Tkt                                                                                                                                      | Cbx5                                                                                                                                     |
|                                                                  | Cdr2                                                                | Acbd3                                                                                                                                      |                                                                                                                                                                 |                                                                                                                                          | Cdr2                                                                                                                                     |
|                                                                  | Chordc1                                                             | Anapc1                                                                                                                                     |                                                                                                                                                                 |                                                                                                                                          | Chordc1                                                                                                                                  |
|                                                                  | Chrna1                                                              | Anln                                                                                                                                       |                                                                                                                                                                 |                                                                                                                                          | Chrna1                                                                                                                                   |
|                                                                  | Chsy1                                                               | Arf3                                                                                                                                       |                                                                                                                                                                 |                                                                                                                                          | Chsy1                                                                                                                                    |
|                                                                  | Ckap4                                                               | Arfip1                                                                                                                                     |                                                                                                                                                                 |                                                                                                                                          | Ckap4                                                                                                                                    |
|                                                                  | Cnn3                                                                | Armc8                                                                                                                                      |                                                                                                                                                                 |                                                                                                                                          | Cnn3                                                                                                                                     |
|                                                                  | Col5a2                                                              | Armcx3                                                                                                                                     |                                                                                                                                                                 |                                                                                                                                          | Col5a2                                                                                                                                   |
|                                                                  | Copz2                                                               | B3galnt2                                                                                                                                   |                                                                                                                                                                 |                                                                                                                                          | Copz2                                                                                                                                    |

|          |          |          |
|----------|----------|----------|
| Creb3l2  | Bcl6     | Creb3l2  |
| Crem     | Bdh1     | Crem     |
| Crispld1 | Bnip2    | Crispld1 |
| Cthrc1   | Btaf1    | Cthrc1   |
| Cyp26b1  | Bxdc2    | Cyp26b1  |
| Dap      | Bysl     | Dap      |
| Dapk2    | C1galt1  | Dapk2    |
| Dgkg     | C1qtnf2  | Dgkg     |
| Dnaja1   | Cacna2d1 | Dnaja1   |
| Dock7    | Cav3     | Dock7    |
| Dscr1l1  | Cbx5     | Dscr1l1  |
| Dusp12   | Cdr2     | Dusp12   |
| Dynll1   | Chordc1  | Dynll1   |
| Efhc2    | Chrna1   | Efhc2    |
| Eln      | Chsy1    | Eln      |
| Emb      | Ckap4    | Emb      |
| Emp2     | Cnn3     | Emp2     |
| Emp3     | Col5a2   | Emp3     |
| Enah     | Copz2    | Enah     |
| Endod1   | Creb3l2  | Endod1   |
| Ereg     | Crem     | Ereg     |
| Ero1l    | Crispld1 | Ero1l    |
| Ext1     | Cthrc1   | Ext1     |
| Fgf1     | Cyp26b1  | Fgf1     |
| Fjx1     | Dap      | Fjx1     |
| Fkbp14   | Dapk2    | Fkbp14   |
| Fryl     | Dgkg     | Fryl     |
| Gal3st4  | Dnaja1   | Gal3st4  |
| Ggh      | Dock7    | Ggh      |
| Gm347    | Dscr1l1  | Gm347    |
| Gm70     | Dusp12   | Gm70     |
| Gmds     | Dynll1   | Gmds     |
| Gne      | Efhc2    | Gne      |
| Golt1b   | Eln      | Golt1b   |
| Gpr125   | Emb      | Gpr125   |
| Gpr177   | Emp2     | Gpr177   |
| Hbegf    | Emp3     | Hbegf    |
| Hcfc2    | Enah     | Hcfc2    |
| Hdac9    | Endod1   | Hdac9    |
| Hdlbp    | Ereg     | Hdlbp    |
| Hisppd2a | Ero1l    | Hisppd2a |
| Hrasls   | Ext1     | Hrasls   |



|          |          |          |
|----------|----------|----------|
| Hrb      | Fgf1     | Hrb      |
| Hsp110   | Fjx1     | Hsp110   |
| Hspa1a   | Fkbp14   | Hspa1a   |
| Hspa1b   | Fryl     | Hspa1b   |
| Hspb2    | Gal3st4  | Hspb2    |
| Htra1    | Ggh      | Htra1    |
| Il17b    | Gm347    | Il17b    |
| Itga9    | Gm70     | Itga9    |
| Itgb1bp1 | Gmds     | Itgb1bp1 |
| Itpr1    | Gne      | Itpr1    |
| Kcnab1   | Golt1b   | Kcnab1   |
| Kdelr2   | Gpr125   | Kdelr2   |
| Kdelr3   | Gpr177   | Kdelr3   |
| Kpna1    | Hbegf    | Kpna1    |
| Ky       | Hcfc2    | Ky       |
| Lancl3   | Hdac9    | Lancl3   |
| Lasp1    | Hdlbp    | Lasp1    |
| Lats2    | Hisppd2a | Lats2    |
| Lbh      | Hrasls   | Lbh      |
| Leprel1  | Hrb      | Leprel1  |
| Lox      | Hsp110   | Lox      |
| Lpp      | Hspa1a   | Lpp      |
| Lrrc61   | Hspa1b   | Lrrc61   |
| Lrrfip1  | Hspb2    | Lrrfip1  |
| Ltbp1    | Htra1    | Ltbp1    |
| Luzp1    | Il17b    | Luzp1    |
| Maged2   | Itga9    | Maged2   |
| Mapk6    | Itgb1bp1 | Mapk6    |
| Mfap5    | Itpr1    | Mfap5    |
| Mgat5    | Kcnab1   | Mgat5    |
| Mobk1b   | Kdelr2   | Mobk1b   |
| Mtdh     | Kdelr3   | Mtdh     |
| Myh10    | Kpna1    | Myh10    |
| Ndel1    | Ky       | Ndel1    |
| Nedd9    | Lancl3   | Nedd9    |
| Nhlrc2   | Lasp1    | Nhlrc2   |
| Nrk      | Lats2    | Nrk      |
| Ntf3     | Lbh      | Ntf3     |
| Olfml2b  | Leprel1  | Olfml2b  |
| P4ha1    | Lox      | P4ha1    |
| Pank2    | Lpp      | Pank2    |
| Pcgf5    | Lrrc61   | Pcgf5    |

|          |         |          |
|----------|---------|----------|
| Pdgfd    | Lrrfip1 | Pdgfd    |
| Pdgfrl   | Ltbp1   | Pdgfrl   |
| Pdlim1   | Luzp1   | Pdlim1   |
| Pdlim5   | Maged2  | Pdlim5   |
| Pgcp     | Mapk6   | Pgcp     |
| Phtf2    | Mfap5   | Phtf2    |
| Pigm     | Mgat5   | Pigm     |
| Pip5k1a  | Mobk1b  | Pip5k1a  |
| Plaur    | Mtdh    | Plaur    |
| Plekha1  | Myh10   | Plekha1  |
| Plod2    | Ndel1   | Plod2    |
| Pols     | Nedd9   | Pols     |
| Psip1    | Nhlrc2  | Psip1    |
| Ptprz1   | Nrk     | Ptprz1   |
| Pycr1    | Ntf3    | Pycr1    |
| Rab23    | Olfml2b | Rab23    |
| Rab31    | P4ha1   | Rab31    |
| Rabep1   | Pank2   | Rabep1   |
| Ramp1    | Pcgf5   | Ramp1    |
| Rarres2  | Pdgfd   | Rarres2  |
| Rassf8   | Pdgfrl  | Rassf8   |
| Rbbp9    | Pdlim1  | Rbbp9    |
| Reck     | Pdlim5  | Reck     |
| Rnd1     | Pgcp    | Rnd1     |
| Rock1    | Phtf2   | Rock1    |
| Rybp     | Pigm    | Rybp     |
| S100a4   | Pip5k1a | S100a4   |
| Sacs     | Plaur   | Sacs     |
| Scx      | Plekha1 | Scx      |
| Sec22l1  | Plod2   | Sec22l1  |
| Sec23a   | Pols    | Sec23a   |
| Sec24a   | Psip1   | Sec24a   |
| Sema3c   | Ptprz1  | Sema3c   |
| Serpine1 | Pycr1   | Serpine1 |
| Sfrp2    | Rab23   | Sfrp2    |
| Sgcb     | Rab31   | Sgcb     |
| Sgce     | Rabep1  | Sgce     |
| Sgcg     | Ramp1   | Sgcg     |
| Sh3bgr   | Rarres2 | Sh3bgr   |
| Six5     | Rassf8  | Six5     |
| Slc7a1   | Rbbp9   | Slc7a1   |
| Slc9a2   | Reck    | Slc9a2   |

|           |           |           |
|-----------|-----------|-----------|
| Smurf2    | Rnd1      | Smurf2    |
| Srm       | Rock1     | Srm       |
| Srprb     | Rybp      | Srprb     |
| Stch      | S100a4    | Stch      |
| Stk25     | Sacs      | Stk25     |
| Stk38l    | Scx       | Stk38l    |
| Stt3a     | Sec2211   | Stt3a     |
| Sulf1     | Sec23a    | Sulf1     |
| Surb7     | Sec24a    | Surb7     |
| Sync      | Sema3c    | Sync      |
| Tdrd3     | Serpine1  | Tdrd3     |
| Tgfb2     | Sfrp2     | Tgfb2     |
| Thbs1     | Sgcb      | Thbs1     |
| Tmem39a   | Sgce      | Tmem39a   |
| Tmem45a   | Sgcg      | Tmem45a   |
| Tmem68    | Sh3bgr    | Tmem68    |
| Tmtc3     | Six5      | Tmtc3     |
| Tnfaip1   | Slc7a1    | Tnfaip1   |
| Tnfrsf11a | Slc9a2    | Tnfrsf11a |
| Tnfrsf12a | Smurf2    | Tnfrsf12a |
| Tnrc15    | Srm       | Tnrc15    |
| Tparl     | Srprb     | Tparl     |
| Tshz3     | Stch      | Tshz3     |
| Tspan2    | Stk25     | Tspan2    |
| Tspan6    | Stk38l    | Tspan6    |
| Unc5d     | Stt3a     | Unc5d     |
| Vkorc1    | Sulf1     | Vkorc1    |
| Wif1      | Surb7     | Wif1      |
| Wisp2     | Sync      | Wisp2     |
| Wtip      | Tdrd3     | Wtip      |
| Yipf5     | Tgfb2     | Yipf5     |
| Zbtb41    | Thbs1     | Zbtb41    |
| Zcchc10   | Tmem39a   | Zcchc10   |
| Zfp148    | Tmem45a   | Zfp148    |
| Zfp451    | Tmem68    | Zfp451    |
| Zfp9      | Tmtc3     | Zfp9      |
|           | Tnfaip1   |           |
|           | Tnfrsf11a |           |
|           | Tnfrsf12a |           |
|           | Tnrc15    |           |
|           | Tparl     |           |
|           | Tshz3     |           |

Tspan2  
Tspan6  
Unc5d  
Vkorc1  
Wif1  
Wisp2  
Wtip  
Yipf5  
Zbtb41  
Zcchc10  
Zfp148  
Zfp451  
Zfp9

**Online Table XVI.**

Differentially Expressed Genes with Unique Entrez Gene Symbols  
for Diabetic ApoE null mice vs. Non-Diabetic ApoE null mice with Positive log Fold  
Change, and for Diabetic ApoE null/RAGE null vs. Diabetic ApoE null with Negative log  
Fold Change and their Boolean Subsets

| Diabetic ApoE null mice vs. Non-Diabetic ApoE null mice Positive | Diabetic ApoE null / RAGE null vs. Diabetic ApoE null mice Negative | Diabetic ApoE null mice vs. Non-Diabetic ApoE null mice Positive UNION Diabetic ApoE null / RAGE null vs. Diabetic ApoE null mice Negative | Diabetic ApoE null mice vs. Non-Diabetic ApoE null mice Positive INTERSECTION Diabetic ApoE null / RAGE null vs. Diabetic ApoE null mice Negative | Diabetic ApoE null mice vs. Non-Diabetic ApoE null mice Positive NOT Diabetic ApoE null / RAGE null vs. Diabetic ApoE null mice Negative | Diabetic ApoE null / RAGE null vs. Diabetic ApoE null mice Negative NOT Diabetic ApoE null mice vs. Non-Diabetic ApoE null mice Positive |
|------------------------------------------------------------------|---------------------------------------------------------------------|--------------------------------------------------------------------------------------------------------------------------------------------|---------------------------------------------------------------------------------------------------------------------------------------------------|------------------------------------------------------------------------------------------------------------------------------------------|------------------------------------------------------------------------------------------------------------------------------------------|
| Anxa3                                                            | Acbd3                                                               | Anxa3                                                                                                                                      | Chordc1                                                                                                                                           | Anxa3                                                                                                                                    | Acbd3                                                                                                                                    |
| Chordc1                                                          | Anapc1                                                              | Chordc1                                                                                                                                    | Crem                                                                                                                                              | Ctps                                                                                                                                     | Anapc1                                                                                                                                   |
| Crem                                                             | Anln                                                                | Crem                                                                                                                                       | Cyp26b1                                                                                                                                           | Eef1e1                                                                                                                                   | Anln                                                                                                                                     |
| Ctps                                                             | Arf3                                                                | Ctps                                                                                                                                       | Dnaja1                                                                                                                                            | Emp1                                                                                                                                     | Arf3                                                                                                                                     |
| Cyp26b1                                                          | Arfip1                                                              | Cyp26b1                                                                                                                                    | Golt1b                                                                                                                                            | Figf                                                                                                                                     | Arfip1                                                                                                                                   |
| Dnaja1                                                           | Armc8                                                               | Dnaja1                                                                                                                                     | Hsp110                                                                                                                                            | Fn1                                                                                                                                      | Armc8                                                                                                                                    |
| Eef1e1                                                           | Armcx3                                                              | Eef1e1                                                                                                                                     | Hspa1b                                                                                                                                            | Hexim1                                                                                                                                   | Armcx3                                                                                                                                   |
| Emp1                                                             | B3galnt2                                                            | Emp1                                                                                                                                       | Rybp                                                                                                                                              | Ifitm2                                                                                                                                   | B3galnt2                                                                                                                                 |
| Figf                                                             | Bcl6                                                                | Figf                                                                                                                                       | S100a4                                                                                                                                            | Kpna2                                                                                                                                    | Bcl6                                                                                                                                     |
| Fn1                                                              | Bdh1                                                                | Fn1                                                                                                                                        | Slc7a1                                                                                                                                            | Kras                                                                                                                                     | Bdh1                                                                                                                                     |
| Golt1b                                                           | Bnip2                                                               | Golt1b                                                                                                                                     | Thbs1                                                                                                                                             | Lmnb2                                                                                                                                    | Bnip2                                                                                                                                    |
| Hexim1                                                           | Btaf1                                                               | Hexim1                                                                                                                                     | Tparl                                                                                                                                             | Mtmr4                                                                                                                                    | Btaf1                                                                                                                                    |
| Hsp110                                                           | Bxdc2                                                               | Hsp110                                                                                                                                     | Tshz3                                                                                                                                             | Pvt1                                                                                                                                     | Bxdc2                                                                                                                                    |
| Hspa1b                                                           | Bysl                                                                | Hspa1b                                                                                                                                     | Tspan6                                                                                                                                            | Rbm8a                                                                                                                                    | Bysl                                                                                                                                     |
| Ifitm2                                                           | C1galt1                                                             | Ifitm2                                                                                                                                     |                                                                                                                                                   | Reln                                                                                                                                     | C1galt1                                                                                                                                  |
| Kpna2                                                            | C1qtnf2                                                             | Kpna2                                                                                                                                      |                                                                                                                                                   | Sfpq                                                                                                                                     | C1qtnf2                                                                                                                                  |
| Kras                                                             | Cacna2d1                                                            | Kras                                                                                                                                       |                                                                                                                                                   | Sfrs3                                                                                                                                    | Cacna2d1                                                                                                                                 |
| Lmnb2                                                            | Cav3                                                                | Lmnb2                                                                                                                                      |                                                                                                                                                   | Tm4sf1                                                                                                                                   | Cav3                                                                                                                                     |
| Mtmr4                                                            | Cbx5                                                                | Mtmr4                                                                                                                                      |                                                                                                                                                   | Ube1l2                                                                                                                                   | Cbx5                                                                                                                                     |
| Pvt1                                                             | Cdr2                                                                | Pvt1                                                                                                                                       |                                                                                                                                                   | Wwc2                                                                                                                                     | Cdr2                                                                                                                                     |
| Rbm8a                                                            | Chordc1                                                             | Rbm8a                                                                                                                                      |                                                                                                                                                   |                                                                                                                                          | Chrna1                                                                                                                                   |
| Reln                                                             | Chrna1                                                              | Reln                                                                                                                                       |                                                                                                                                                   |                                                                                                                                          | Chsy1                                                                                                                                    |
| Rybp                                                             | Chsy1                                                               | Rybp                                                                                                                                       |                                                                                                                                                   |                                                                                                                                          | Ckap4                                                                                                                                    |
| S100a4                                                           | Ckap4                                                               | S100a4                                                                                                                                     |                                                                                                                                                   |                                                                                                                                          | Cnn3                                                                                                                                     |
| Sfpq                                                             | Cnn3                                                                | Sfpq                                                                                                                                       |                                                                                                                                                   |                                                                                                                                          | Col5a2                                                                                                                                   |
| Sfrs3                                                            | Col5a2                                                              | Sfrs3                                                                                                                                      |                                                                                                                                                   |                                                                                                                                          | Copz2                                                                                                                                    |
| Slc7a1                                                           | Copz2                                                               | Slc7a1                                                                                                                                     |                                                                                                                                                   |                                                                                                                                          | Creb3l2                                                                                                                                  |

|        |          |          |          |
|--------|----------|----------|----------|
| Thbs1  | Creb3l2  | Thbs1    | Crispld1 |
| Tm4sf1 | Crem     | Tm4sf1   | Cthrc1   |
| Tparl  | Crispld1 | Tparl    | Dap      |
| Tshz3  | Cthrc1   | Tshz3    | Dapk2    |
| Tspan6 | Cyp26b1  | Tspan6   | Dgkg     |
| Ube1l2 | Dap      | Ube1l2   | Dock7    |
| Wwc2   | Dapk2    | Wwc2     | Dscr1l1  |
|        | Dgkg     |          | Dusp12   |
|        | Dnaja1   | Acbd3    | Dynll1   |
|        | Dock7    | Anapc1   | Efhc2    |
|        | Dscr1l1  | Anln     | Eln      |
|        | Dusp12   | Arf3     | Emb      |
|        | Dynll1   | Arfip1   | Emp2     |
|        | Efhc2    | Armc8    | Emp3     |
|        | Eln      | Armcx3   | Enah     |
|        | Emb      | B3galnt2 | Endod1   |
|        | Emp2     | Bcl6     | Ereg     |
|        | Emp3     | Bdh1     | Ero1l    |
|        | Enah     | Bnip2    | Ext1     |
|        | Endod1   | Btaf1    | Fgf1     |
|        | Ereg     | Bxdc2    | Fjx1     |
|        | Ero1l    | Bysl     | Fkbp14   |
|        | Ext1     | C1galt1  | Fryl     |
|        | Fgf1     | C1qtnf2  | Gal3st4  |
|        | Fjx1     | Cacna2d1 | Ggh      |
|        | Fkbp14   | Cav3     | Gm347    |
|        | Fryl     | Cbx5     | Gm70     |
|        | Gal3st4  | Cdr2     | Gmds     |
|        | Ggh      | Chrna1   | Gne      |
|        | Gm347    | Chsy1    | Gpr125   |
|        | Gm70     | Ckap4    | Gpr177   |
|        | Gmds     | Cnn3     | Hbegf    |
|        | Gne      | Col5a2   | Hcfc2    |
|        | Golt1b   | Copz2    | Hdac9    |
|        | Gpr125   | Creb3l2  | Hdlbp    |
|        | Gpr177   | Crispld1 | Hisppd2a |
|        | Hbegf    | Cthrc1   | Hrasls   |
|        | Hcfc2    | Dap      | Hrb      |
|        | Hdac9    | Dapk2    | Hspa1a   |
|        | Hdlbp    | Dgkg     | Hspb2    |
|        | Hisppd2a | Dock7    | Htra1    |

|          |          |          |
|----------|----------|----------|
| Hrasls   | Dscr111  | Il17b    |
| Hrb      | Dusp12   | Itga9    |
| Hsp110   | Dynll1   | Itgb1bp1 |
| Hspa1a   | Efhc2    | Itpr1    |
| Hspa1b   | Eln      | Kcnab1   |
| Hspb2    | Emb      | Kdelr2   |
| Htra1    | Emp2     | Kdelr3   |
| Il17b    | Emp3     | Kpna1    |
| Itga9    | Enah     | Ky       |
| Itgb1bp1 | Endod1   | Lancl3   |
| Itpr1    | Ereg     | Lasp1    |
| Kcnab1   | Ero1l    | Lats2    |
| Kdelr2   | Ext1     | Lbh      |
| Kdelr3   | Fgf1     | Leprel1  |
| Kpna1    | Fjx1     | Lox      |
| Ky       | Fkbp14   | Lpp      |
| Lancl3   | Fryl     | Lrrc61   |
| Lasp1    | Gal3st4  | Lrrfip1  |
| Lats2    | Ggh      | Ltbp1    |
| Lbh      | Gm347    | Luzp1    |
| Leprel1  | Gm70     | Maged2   |
| Lox      | Gmds     | Mapk6    |
| Lpp      | Gne      | Mfap5    |
| Lrrc61   | Gpr125   | Mgat5    |
| Lrrfip1  | Gpr177   | Mobk1b   |
| Ltbp1    | Hbegf    | Mtdh     |
| Luzp1    | Hcfc2    | Myh10    |
| Maged2   | Hdac9    | Ndel1    |
| Mapk6    | Hdlbp    | Nedd9    |
| Mfap5    | Hisppd2a | Nhlrc2   |
| Mgat5    | Hrasls   | Nrk      |
| Mobk1b   | Hrb      | Ntf3     |
| Mtdh     | Hspa1a   | Olfml2b  |
| Myh10    | Hspb2    | P4ha1    |
| Ndel1    | Htra1    | Pank2    |
| Nedd9    | Il17b    | Pcgf5    |
| Nhlrc2   | Itga9    | Pdgfd    |
| Nrk      | Itgb1bp1 | Pdgfrl   |
| Ntf3     | Itpr1    | Pdlim1   |
| Olfml2b  | Kcnab1   | Pdlim5   |
| P4ha1    | Kdelr2   | Pgcp     |

|          |         |          |
|----------|---------|----------|
| Pank2    | Kdelr3  | Phtf2    |
| Pcgf5    | Kpna1   | Pigm     |
| Pdgrd    | Ky      | Pip5k1a  |
| Pdgfrl   | Lancl3  | Plaur    |
| Pdlim1   | Lasp1   | Plekha1  |
| Pdlim5   | Lats2   | Plod2    |
| Pgcp     | Lbh     | Pols     |
| Phtf2    | Leprel1 | Psip1    |
| Pigm     | Lox     | Ptprz1   |
| Pip5k1a  | Lpp     | Pycr1    |
| Plaur    | Lrrc61  | Rab23    |
| Plekha1  | Lrrfip1 | Rab31    |
| Plod2    | Ltbp1   | Rabep1   |
| Pols     | Luzp1   | Ramp1    |
| Psip1    | Maged2  | Rarres2  |
| Ptprz1   | Mapk6   | Rassf8   |
| Pycr1    | Mfap5   | Rbbp9    |
| Rab23    | Mgat5   | Reck     |
| Rab31    | Mobk1b  | Rnd1     |
| Rabep1   | Mtdh    | Rock1    |
| Ramp1    | Myh10   | Sacs     |
| Rarres2  | Ndel1   | Scx      |
| Rassf8   | Nedd9   | Sec22l1  |
| Rbbp9    | Nhlrc2  | Sec23a   |
| Reck     | Nrk     | Sec24a   |
| Rnd1     | Ntf3    | Sema3c   |
| Rock1    | Olfml2b | Serpine1 |
| Rybp     | P4ha1   | Sfrp2    |
| S100a4   | Pank2   | Sgcb     |
| Sacs     | Pcgf5   | Sgce     |
| Scx      | Pdgrd   | Sgcb     |
| Sec22l1  | Pdgfrl  | Sh3bgr   |
| Sec23a   | Pdlim1  | Six5     |
| Sec24a   | Pdlim5  | Slc9a2   |
| Sema3c   | Pgcp    | Smurf2   |
| Serpine1 | Phtf2   | Srm      |
| Sfrp2    | Pigm    | Srprb    |
| Sgcb     | Pip5k1a | Stch     |
| Sgce     | Plaur   | Stk25    |
| Sgcb     | Plekha1 | Stk38l   |
| Sh3bgr   | Plod2   | Stt3a    |



|           |          |           |
|-----------|----------|-----------|
| Six5      | Pols     | Sulf1     |
| Slc7a1    | Psip1    | Surb7     |
| Slc9a2    | Ptprz1   | Sync      |
| Smurf2    | Pycr1    | Tdrd3     |
| Srm       | Rab23    | Tgfb2     |
| Srprb     | Rab31    | Tmem39a   |
| Stch      | Rabep1   | Tmem45a   |
| Stk25     | Ramp1    | Tmem68    |
| Stk38l    | Rarres2  | Tmtc3     |
| Stt3a     | Rassf8   | Tnfaip1   |
| Sulf1     | Rbbp9    | Tnfrsf11a |
| Surb7     | Reck     | Tnfrsf12a |
| Sync      | Rnd1     | Tnrc15    |
| Tdrd3     | Rock1    | Tspan2    |
| Tgfb2     | Sacs     | Unc5d     |
| Thbs1     | Scx      | Vkorc1    |
| Tmem39a   | Sec22l1  | Wif1      |
| Tmem45a   | Sec23a   | Wisp2     |
| Tmem68    | Sec24a   | Wtip      |
| Tmtc3     | Sema3c   | Yipf5     |
| Tnfaip1   | Serpine1 | Zbtb41    |
| Tnfrsf11a | Sfrp2    | Zcchc10   |
| Tnfrsf12a | Sgcb     | Zfp148    |
| Tnrc15    | Sgce     | Zfp451    |
| Tparl     | Sgcg     | Zfp9      |
| Tshz3     | Sh3bgr   |           |
| Tspan2    | Six5     |           |
| Tspan6    | Slc9a2   |           |
| Unc5d     | Smurf2   |           |
| Vkorc1    | Srm      |           |
| Wif1      | Srprb    |           |
| Wisp2     | Stch     |           |
| Wtip      | Stk25    |           |
| Yipf5     | Stk38l   |           |
| Zbtb41    | Stt3a    |           |
| Zcchc10   | Sulf1    |           |
| Zfp148    | Surb7    |           |
| Zfp451    | Sync     |           |
| Zfp9      | Tdrd3    |           |
|           | Tgfb2    |           |
|           | Tmem39a  |           |

Tmem45a  
Tmem68  
Tmtc3  
Tnfaip1  
Tnfrsf11a  
Tnfrsf12a  
Tnrc15  
Tspan2  
Unc5d  
Vkorc1  
Wif1  
Wisp2  
Wtip  
Yipf5  
Zbtb41  
Zcchc10  
Zfp148  
Zfp451  
Zfp9

**Online Table XVII.**

Differentially Expressed Genes with Unique Entrez Gene Symbols for Diabetic ApoE null vs. Non-Diabetic ApoE null mice with Negative log Fold Change, and for Diabetic ApoE null/RAGE null vs. Diabetic ApoE null mice with Positive log Fold Change and their Boolean Subsets

| Diabetic ApoE null mice vs. Non-Diabetic ApoE null mice Negative | Diabetic ApoE null / RAGE null vs. Diabetic ApoE null mice Positive | Diabetic ApoE null mice vs. Non-Diabetic ApoE null mice Negative UNION Diabetic ApoE null / RAGE null vs. Diabetic ApoE null mice Positive | Diabetic ApoE null mice vs. Non-Diabetic ApoE null mice Negative INTERSECTION Diabetic ApoE null / RAGE null vs. Diabetic ApoE null mice Positive | Diabetic ApoE null mice vs. Non-Diabetic ApoE null mice Negative NOT Diabetic ApoE null / RAGE null vs. Diabetic ApoE null mice Positive | Diabetic ApoE null / RAGE null vs. Diabetic ApoE null mice Positive NOT Diabetic ApoE null mice vs. Non-Diabetic ApoE null mice Negative |
|------------------------------------------------------------------|---------------------------------------------------------------------|--------------------------------------------------------------------------------------------------------------------------------------------|---------------------------------------------------------------------------------------------------------------------------------------------------|------------------------------------------------------------------------------------------------------------------------------------------|------------------------------------------------------------------------------------------------------------------------------------------|
| Aacs                                                             | Acot1                                                               | Aacs                                                                                                                                       | Erdr1                                                                                                                                             | Aacs                                                                                                                                     | Acot1                                                                                                                                    |
| Acaca                                                            | Atp6v1d                                                             | Acaca                                                                                                                                      |                                                                                                                                                   | Acaca                                                                                                                                    | Atp6v1d                                                                                                                                  |
| Acacb                                                            | Bcas3                                                               | Acacb                                                                                                                                      |                                                                                                                                                   | Acacb                                                                                                                                    | Bcas3                                                                                                                                    |
| Acly                                                             | Ccrn4l                                                              | Acly                                                                                                                                       |                                                                                                                                                   | Acly                                                                                                                                     | Ccrn4l                                                                                                                                   |
| Acss2                                                            | Chd1                                                                | Acss2                                                                                                                                      |                                                                                                                                                   | Acss2                                                                                                                                    | Chd1                                                                                                                                     |
| Agbl3                                                            | Chd2                                                                | Agbl3                                                                                                                                      |                                                                                                                                                   | Agbl3                                                                                                                                    | Chd2                                                                                                                                     |
| Erdr1                                                            | Eml5                                                                | Erdr1                                                                                                                                      |                                                                                                                                                   | Fasn                                                                                                                                     | Eml5                                                                                                                                     |
| Fasn                                                             | Erdr1                                                               | Fasn                                                                                                                                       |                                                                                                                                                   | Fmo5                                                                                                                                     | Glo1                                                                                                                                     |
| Fmo5                                                             | Glo1                                                                | Fmo5                                                                                                                                       |                                                                                                                                                   | H2-Q10                                                                                                                                   | Glp1r                                                                                                                                    |
| H2-Q10                                                           | Glp1r                                                               | H2-Q10                                                                                                                                     |                                                                                                                                                   | Mod1                                                                                                                                     | Gpatc2                                                                                                                                   |
| Mod1                                                             | Gpatc2                                                              | Mod1                                                                                                                                       |                                                                                                                                                   | Mtmr11                                                                                                                                   | Grina                                                                                                                                    |
| Mtmr11                                                           | Grina                                                               | Mtmr11                                                                                                                                     |                                                                                                                                                   | Nudt18                                                                                                                                   | H6pd                                                                                                                                     |
| Nudt18                                                           | H6pd                                                                | Nudt18                                                                                                                                     |                                                                                                                                                   | Ppp2r1b                                                                                                                                  | Mrpl15                                                                                                                                   |
| Ppp2r1b                                                          | Mrpl15                                                              | Ppp2r1b                                                                                                                                    |                                                                                                                                                   | Pygl                                                                                                                                     | Ngp                                                                                                                                      |
| Pygl                                                             | Ngp                                                                 | Pygl                                                                                                                                       |                                                                                                                                                   | Slc1a5                                                                                                                                   | Pbef1                                                                                                                                    |
| Slc1a5                                                           | Pbef1                                                               | Slc1a5                                                                                                                                     |                                                                                                                                                   | Slc25a1                                                                                                                                  | Prlr                                                                                                                                     |
| Slc25a1                                                          | Prlr                                                                | Slc25a1                                                                                                                                    |                                                                                                                                                   | Thrsp                                                                                                                                    | Prodh                                                                                                                                    |
| Thrsp                                                            | Prodh                                                               | Thrsp                                                                                                                                      |                                                                                                                                                   | Tkt                                                                                                                                      | Sgol2                                                                                                                                    |
| Tkt                                                              | Sgol2                                                               | Tkt                                                                                                                                        |                                                                                                                                                   |                                                                                                                                          | Sh3gl2                                                                                                                                   |
|                                                                  | Sh3gl2                                                              | Acot1                                                                                                                                      |                                                                                                                                                   |                                                                                                                                          | Sorbs1                                                                                                                                   |
|                                                                  | Sorbs1                                                              | Atp6v1d                                                                                                                                    |                                                                                                                                                   |                                                                                                                                          | Sord                                                                                                                                     |
|                                                                  | Sord                                                                | Bcas3                                                                                                                                      |                                                                                                                                                   |                                                                                                                                          | St8sia6                                                                                                                                  |
|                                                                  | St8sia6                                                             | Ccrn4l                                                                                                                                     |                                                                                                                                                   |                                                                                                                                          | Timp4                                                                                                                                    |
|                                                                  | Timp4                                                               | Chd1                                                                                                                                       |                                                                                                                                                   |                                                                                                                                          | Trp53inp2                                                                                                                                |
|                                                                  | Trp53inp2                                                           | Chd2                                                                                                                                       |                                                                                                                                                   |                                                                                                                                          | Ube2i                                                                                                                                    |
|                                                                  | Ube2i                                                               | Eml5                                                                                                                                       |                                                                                                                                                   |                                                                                                                                          | Xdh                                                                                                                                      |
|                                                                  | Xdh                                                                 | Glo1                                                                                                                                       |                                                                                                                                                   |                                                                                                                                          |                                                                                                                                          |
|                                                                  |                                                                     | Glp1r                                                                                                                                      |                                                                                                                                                   |                                                                                                                                          |                                                                                                                                          |
|                                                                  |                                                                     | Gpatc2                                                                                                                                     |                                                                                                                                                   |                                                                                                                                          |                                                                                                                                          |

Grina  
H6pd  
Mrpl15  
Ngp  
Pbef1  
Prlr  
Prodh  
Sgol2  
Sh3gl2  
Sorbs1  
Sord  
St8sia6  
Timp4  
Trp53inp2  
Ube2i  
Xdh
